# Anaerobic conditions unmask antimicrobial resistance in *Vibrio cholerae*

A. Creasy-Marrazzo<sup>1†</sup>, M.M. Saber<sup>2†</sup>, M. Kamat<sup>3</sup>, L. S. Bailey<sup>3</sup>, L. Brinkley<sup>1</sup>, Y. Begum<sup>4</sup>,  
M.M. Rashid<sup>4</sup>, A. I. Khan<sup>4</sup>, F. Qadri<sup>4</sup>, K. B. Basso<sup>3</sup>, B. J. Shapiro<sup>2</sup>, E. J. Nelson<sup>1\*</sup>

<sup>1</sup> Departments of Pediatrics and Environmental and Global Health, University of Florida, Gainesville, FL, USA,

<sup>2</sup> Department of Microbiology & Immunology, McGill University

<sup>3</sup> Departments of Chemistry, University of Florida, Gainesville, FL, USA,

<sup>4</sup> Infectious Diseases Division (IDD) & Nutrition and Clinical Services Division (NCSD), International Centre for Diarrhoeal Disease Research, Bangladesh (icddr,b), Dhaka, Bangladesh

† Co-first authors

\* Corresponding author

Address: University of Florida, 2055 Mowry, Gainesville, FL 32611.

Email: [eric.nelson@ufl.edu](mailto:eric.nelson@ufl.edu)

Keywords: Antimicrobial resistance, AMR, antibiotics, cholera, diarrhoea, diarrhea,

*Vibrio cholerae*, enteropathogens, Bangladesh, anaerobic, anoxic, hypoxic, respiration

Abstract: 148 words

Text: 3478 words

1 **Abstract**

2 The antibiotic formulary is threatened by high rates of antimicrobial resistance (AMR)  
3 among enteropathogens. Enteric bacteria often undergo anaerobic respiration within the  
4 gastrointestinal tract, yet little is known about how anaerobic conditions influence AMR.  
5 The facultative enteropathogen *Vibrio cholerae* was chosen as a model to address this  
6 knowledge gap. *V. cholerae* isolates were tested for resistance under aerobic and  
7 anaerobic conditions against clinically relevant antibiotics. Using conventional  
8 breakpoints established for aerobic conditions, the odds of classifying isolates as  
9 resistant increased over 10 times for ciprofloxacin and 100 times for azithromycin under  
10 anaerobic conditions compared to aerobic conditions; for doxycycline, nearly all isolates  
11 remained sensitive. Genome-wide association studies found associations between  
12 genetic elements and AMR phenotypes that varied by oxygen exposure and antibiotic  
13 concentrations; AMR phenotypes were more heritable – and more AMR genes were  
14 discovered – under anaerobic conditions. These findings challenge the paradigm of  
15 testing facultative enteropathogens for AMR under aerobic conditions alone.

## 16 INTRODUCTION

17 Clinically relevant laboratory methods are essential to gauge the extent to which the  
18 antibiotic formulary is threatened by antimicrobial resistance (AMR). Knowledge gaps  
19 remain on the degree to which *in vitro* AMR assays reflect *in vivo* AMR physiology.  
20 Facultative anaerobic pathogens experience hypoxia and anoxia within the  
21 gastrointestinal tract, yet AMR assays rely on aerobic conditions [1]. How oxygen  
22 exposure effects AMR is poorly understood. To investigate this question, we chose the  
23 facultative anaerobe *Vibrio cholerae* as a model system. In *V. cholerae*, mechanisms of  
24 AMR and anaerobic growth are well characterized *in vivo* and *in vitro* [2-8], and cholera  
25 is one of the few non-invasive diarrheal diseases for which antibiotics are indicated,  
26 albeit conditionally [9-11].

27 Rehydration is the definitive intervention for acute diarrheal disease [9]; antibiotics are  
28 supportive and indicated for only a few diarrheal diseases, including cholera. The World  
29 Health Organization (WHO) recommends ciprofloxacin, azithromycin or doxycycline for  
30 cholera patients with severe dehydration [9-11]; antibiotics shorten the frequency and  
31 duration of diarrhea. In practice, guideline adherence in cholera endemic regions may  
32 be low out of clinical concern that a patient 'might' have cholera and may develop  
33 severe dehydration, contributing to rates of inappropriate antibiotic usage that can rise  
34 above 90% [12, 13]. Strong regional associations between antibiotic use and rise of  
35 AMR have been observed across enteric taxa [14, 15]. Given that AMR genetic  
36 elements frequently co-localize on mobile elements [16], inappropriate single-agent  
37 therapy also poses a risk of multidrug-resistance (MDR) selection.

38 Associations between AMR phenotypes and genotypes are known for the three  
39 antibiotics recommended to treat cholera; the cognate AMR mechanisms share  
40 commonality across Gram negative taxa. Ciprofloxacin (a fluoroquinolone) resistance  
41 mechanisms include mutations in genes encoding type II topoisomerases:  
42 heterotetrameric DNA gyrase (GyrA<sub>2</sub>GyrB<sub>2</sub>) and DNA topoisomerase IV (ParC<sub>2</sub>ParE<sub>2</sub>).  
43 Mutations in the quinolone resistance-determining region (QRDR) of *gyrA* and *parC* can  
44 yield additive resistance phenotypes [17]. Efflux pump upregulation, downregulation of  
45 outer membrane porins that permit quinolone entry and Qnr expression that protects the  
46 target gyrase also convey fluoroquinolone resistance [17]. Resistance can increase over  
47 30-fold compared to wild-type when strains harbor *qnr* family genes.

48 In *V. cholerae*, diverse AMR genes, including *qnr*, often reside on an integrative and  
49 conjugative element (ICE; 'SXT' in *V. cholerae*) [16, 18, 19]. Azithromycin (a macrolide)  
50 resistance mechanisms are similarly diverse and include mutations in the 23S ribosomal  
51 RNA (rRNA) target genes and ribosomal protein genes. Macrolide resistance is also  
52 conveyed by carriage of rRNA methyltransferase genes (*erm*) and associated induction  
53 mechanisms, *cis*-acting peptides, efflux systems (e.g. *mef*, *msr*), macrolide esterases  
54 (e.g. *ere*), and macrolide phosphotransferases (e.g. *mphA*); *mphA* often resides in the  
55 *V. cholerae* SXT element [20]. Doxycycline (a tetracycline) resistance is conferred by  
56 mutations in the 16S rRNA component of the 30S ribosomal subunit [21]. Additional  
57 mechanisms include tetracycline-specific ribosomal protection proteins (RPPs),  
58 tetracycline specific efflux pumps (e.g. *tet(59)*) that can reside on SXT element intrinsic  
59 efflux pumps, AraC-family transcriptional activators (e.g. MarA), and cytoplasmic ATP-  
60 dependent serine proteases [21].

61 Associations between AMR phenotypes and genotypes have been studied by random  
62 mutagenesis, phenotypic screening, and network analyses, and applied in *V. cholerae*  
63 [22]. These approaches uncovered how the effect of an antibiotic is shaped by a large  
64 number of often more subtle physiologic perturbations, including altered DNA  
65 synthesis/repair, central metabolism/growth, and SOS response [23, 24]. A limitation of  
66 AMR assays conducted under aerobic conditions alone may not reflect these  
67 physiologic perturbations experienced in the host. Aerobic oxidative phosphorylation  
68 generates reactive oxygen species (ROS) that are lethal unless a sufficient defense is  
69 mounted by factors like superoxide dismutase, catalase, and glutathione systems [25,  
70 26]. Under anaerobic conditions, growth rate typically slows and proton motive force is  
71 reduced [27, 28], which can have both synergistic and antagonistic effects on antibiotics  
72 [24, 29]. In *Escherichia coli*, ROS are generated after fluoroquinolone treatment under  
73 aerobic conditions[30] and fluoroquinolone resistance increases under anaerobic  
74 conditions [31, 32]. The extent to which tetracyclines and macrolides induce ROS and  
75 how anaerobiosis influences resistance is less known [23, 33].

76 The objective of this study was to compare AMR phenotypes, with underlying  
77 genotypes, under aerobic and anaerobic conditions. We found that resistance increased  
78 significantly under anaerobic conditions for select antibiotics, and distinct genetic  
79 elements associated with AMR with and without oxygen exposure.

## 80 **METHODS**

81 **Clinical sample collection.** The two sample collections analyzed were part of  
82 previously published IRB approved studies [12, 34]. In the primary collection, stool

83 samples were obtained during the spring cholera outbreak period of 2006 at the  
84 International Centre for Diarrhoeal Disease Research, Bangladesh (icddr,b) in Dhaka,  
85 Bangladesh. Samples were collected prior to hospital administration of antibiotics;  
86 patient histories were negative for known antibiotic exposure. The library consisted of  
87 67 *V. cholerae* isolates (Supplementary Table 1); paired stool supernatant for mass  
88 spectrometry was available for 50 isolates. In the secondary collection, samples were  
89 obtained in 2018 as part of a cholera surveillance study conducted across Bangladesh  
90 [12]. Samples were collected at hospital admission independent of reported antibiotic  
91 exposure; 120 isolates were analyzed to assess generalizability of the AMR profiles  
92 identified in the primary collection.

93 **Antimicrobial resistance testing.** Growth kinetics and the minimal inhibitory  
94 concentration (MIC) determinations for ciprofloxacin, azithromycin, and doxycycline  
95 were performed on isolates from the primary collection in LB broth with twelve two-fold  
96 serial dilutions with concentrations approximated for CLSI MIC breakpoints[1] for *V.*  
97 *cholerae* (ciprofloxacin = 2 µg/ml; azithromycin = 8 µg/ml; doxycycline = 8 µg/ml)[1].  
98 Isolates were prepared and grown aerobically at 37°C in 15-ml tubes containing 5-ml LB  
99 broth at 220 rpm Bacteria were back-diluted to a final OD<sub>600</sub> of 0.01 (200 µl/well) in LB  
100 with or without the respective antibiotic dilution-series in black Corning CoStar clear-  
101 bottom 96-well plates. Plates were placed in a BioTek Synergy H1 reader pre-warmed  
102 to 37°C with the lid on. Anaerobic conditions were generated using a continuous  
103 chamber flow (5% CO<sub>2</sub>, 95% N<sub>2</sub>) and a BioTek CO<sub>2</sub>/O<sub>2</sub> gas controller; anaerobic growth  
104 plates were given a 10-minute equilibration period. OD<sub>600</sub> was measured every 2  
105 minutes for 8 hours at 37°C with orbital shaking at 220 rpm. A standard logistic equation

106 was fit to growth curve data using the R package *growthcurver* version 0.3.0[35].  
107 Outcome measures were intrinsic growth velocity (growth rate that would occur if there  
108 were no restrictions on total population size), carrying capacity (K; maximum possible  
109 population size), and area under the curve (AUC). The MIC was determined using a  
110 logistic fit for growth over the twelve, two-fold serial dilutions of the test antibiotic. Binary  
111 phenotypic resistance categories were set in concordance with Clinical and Laboratory  
112 Standards Institute (CLSI); intermediate and resistant isolates were scored as resistant.  
113 CLSI standards are based on assays conducted aerobically and break points are set by  
114 clinical correlates of disease.

115 **Use of catalase to determine if ROS contribute to antibiotic sensitivity.** To test if  
116 the reduction of ROS was associated with increased resistance to antibiotics under  
117 aerobic conditions, MICs were determined for two select strains (E7946, EN160)  
118 with/without catalase (10 U/ml) added to the media. Growth curves were performed with  
119 viable counts as endpoints to determine the minimum dose for lethality by H<sub>2</sub>O<sub>2</sub> or  
120 protection by catalase.

121 **Molecular procedures.** Whole-genome sequencing was performed with conventional  
122 methods (Supplementary Material). Known resistance genes were identified using the  
123 comprehensive antibiotic resistance database (CARD) [36] and ResFinder [37]. A series  
124 of genome-wide association studies (GWAS) were conducted on the primary collection  
125 to detect genomic variants associated with antibiotic resistance phenotypes under both  
126 aerobic and anaerobic conditions; a total of 30 GWAS were generated by 3 antibiotics x  
127 5 antibiotic concentrations x 2 oxygen conditions. The sample size for analysis was 67  
128 genomes. GWAS bioinformatic methods are provided (Supplementary Material).

129 **Antibiotic detection by liquid chromatography mass spectrometry (LC-MS/MS).**

130 The approach was based on a former study [38]. Preparation of stool supernatants for  
131 analysis using high-performance liquid chromatography (Thermo UltiMate 3000 series)  
132 and an LTQ XL ion trap mass spectrometer (Thermo Fisher Scientific) are provided  
133 (Supplementary Material).

134 **Statistical analysis.** Bivariate analyses of categorical data were analyzed using  
135 Fisher's Exact Test, and continuous data were analyzed using the Mann-Whitney U  
136 Test ( $\alpha = 0.05$ ). McNemar's test was used to analyze paired data ( $\alpha = 0.05$ ).

137 **RESULTS**

138 **Comparison of antimicrobial resistance under aerobic and anaerobic conditions.**

139 Pairwise analyses for baseline growth parameters found that carrying capacity, AUC,  
140 and growth velocity of the population were significantly lower under anaerobic  
141 compared to aerobic conditions (Supplementary Table 2). In this physiologic context,  
142 AMR differed depending on anaerobic versus aerobic conditions (Figure 1); distributions  
143 of single and multi-agent AMR phenotypes are shown (Figure 2A). The MIC modes for  
144 ciprofloxacin were 7  $\mu\text{g/ml}$  (min=0.0016  $\mu\text{g/ml}$ ; max=32  $\mu\text{g/ml}$ ) and 2  $\mu\text{g/ml}$  (min=0.004  
145  $\mu\text{g/ml}$ ; max=8  $\mu\text{g/ml}$ ) under anaerobic and aerobic conditions, respectively  
146 (Supplementary Table 3); the rates of resistance under anaerobic (93%; N=62/67) and  
147 aerobic (54%; N=36/67) conditions were significantly different (Figure 1a;  
148 Supplementary Table 4). For azithromycin, the MIC modes were 32  $\mu\text{g/ml}$  (min= 8  
149  $\mu\text{g/ml}$ ; max=128  $\mu\text{g/ml}$ ) and 4  $\mu\text{g/ml}$  (min=1  $\mu\text{g/ml}$ ; max=32  $\mu\text{g/ml}$ ) under anaerobic and  
150 aerobic conditions respectively (Supplementary Table 3). The rates of resistance under



151 anaerobic (n=67/67; 100%) and aerobic (n=15/67; 22%) conditions were significantly  
152 different (Figure 1b; Supplementary Table 4). For doxycycline, the MIC modes were 1  
153 µg/ml under both aerobic and anaerobic conditions, respectively (Supplementary Table  
154 3); only two isolates were found to be resistant under anaerobic conditions and one  
155 under aerobic conditions. The odds of classifying isolates as resistant increased over 10  
156 times for ciprofloxacin (OR= 10.5; 95% CI= 3.61-37.7) and over 200 times for  
157 azithromycin (OR = 213; 95% CI= 31.9->5000) under anaerobic compared to aerobic  
158 conditions.

159 To evaluate the generalizability of these findings from the primary sample collection,  
160 pairwise analyses were conducted on 120 isolates from the secondary sample  
161 collection (Supplementary Table 5). For ciprofloxacin, the rates of resistance were  
162 significantly different under anaerobic (39%; n= 47/120) and aerobic conditions (1.6%;  
163 n= 2/120; McNemar's test p<0.001). For azithromycin, the rates of resistance were  
164 significantly different under anaerobic (100%; N= 120/120) and aerobic conditions (47%;  
165 N= 56/120; McNemar's test p<0.001); only two isolates were resistant under anaerobic  
166 conditions and zero under aerobic conditions. The odds of classifying isolates as  
167 resistant increased over 37 times for ciprofloxacin (OR= 37.5; 95% CI= 9.34-328) and  
168 over 136 times under azithromycin (OR = 136; 95% CI= 22.3 - >5000) for anaerobic  
169 compared to aerobic conditions.

170 **Addition of catalase to test if reactive oxygen species effect antibiotic**  
171 **resistance/sensitivity under aerobic conditions.** For ciprofloxacin, the MICs for the  
172 sensitive reference strain E7946 (Cip<sup>S</sup>, Azi<sup>S</sup>, Dox<sup>S</sup>) and the resistant clinical isolate  
173 EN160 (Cip<sup>R</sup>, Azi<sup>R</sup>, Dox<sup>S</sup>) remained unchanged when catalase was added to the media

174 under aerobic conditions. The addition of catalase was not associated with differences  
175 in AUCs for both E7946 and EN160 in media containing ciprofloxacin, azithromycin, or  
176 doxycycline at 2-fold below the MIC. The AUCs in LB media with and without catalase  
177 alone for E7946 and EN160 were not statistically different (Supplementary Table 6).

178 **Molecular AMR correlates under aerobic and anaerobic conditions.** The distribution  
179 of known AMR genetic elements are shown (Fig 2B). AMR associated point mutations  
180 (likely transmitted vertically, not on an established mobilizable element), and genes on  
181 known horizontally transferred mobilizable elements, are provided (Supplementary  
182 Material). The integrative conjugative element (ICE) SXT/R391 was found in 90%  
183 (60/67) of isolates. The ICE elements contained a pentapeptide repeat protein  
184 conferring fluoroquinolone resistance (*qnr<sub>VC</sub>*), a macrolide-inactivating  
185 phosphotransferase (*mph(A)*), and a major facilitator superfamily (MFS) efflux pump  
186 conferring tetracycline resistance (*tet(59)*) [39-42]. The genes *qnr<sub>VC</sub>*, *mph(A)*, and *tet(59)*  
187 were found in 78% (52/67), 33% (22/67), and 78% (52/67) of isolates, respectively.  
188 Ciprofloxacin resistance under both anaerobic and aerobic conditions was significantly  
189 associated with *qnr<sub>VC</sub>*, *gyrA* and *parC* (Supplementary Table 7). Identification of the  
190 known azithromycin AMR gene *mph(A)* was significantly associated with resistance  
191 under aerobic conditions alone ( $P < 0.001$ ). The gene *tet(59)* was not associated with  
192 doxycycline resistance under aerobic or anaerobic conditions (both  $p = 0.566$ ).

193 GWAS was conducted to more broadly explore the genetic basis of AMR. This  
194 approach used the phenotype of AUC to represent 'growth' with or without exposure to  
195 the three antibiotics at five concentrations under either aerobic or anaerobic conditions.  
196 Phenotypes (AUCs) at similar antibiotic concentrations were positively correlated within

197 aerobic and anaerobic conditions for all three antibiotics (Figure 3). Phenotypes were  
198 also positively correlated between aerobic and anaerobic conditions for ciprofloxacin  
199 (Figure 3a). However, AUCs were weakly, or even negatively, correlated between  
200 aerobic and anaerobic conditions for azithromycin and doxycycline (Figure 3b,c). These  
201 results reinforce the proposal that anaerobic and aerobic growth are distinct under  
202 antibiotic pressure.

203 The heritability of the AMR phenotypes (AUCs) was estimated prior to the GWAS.  
204 Heritability ( $h^2$ ) was defined as the proportion of phenotypic variation explained by  
205 genetic variation, measured as unique contiguous tracts of the genome (unitigs) that tag  
206 both single nucleotide variants, indels, and gene content changes (Methods). We found  
207 relatively high heritability ( $h^2$  in the range 0.60-0.99) of growth across concentrations of  
208 ciprofloxacin under both aerobic and anaerobic conditions, yielding statistically  
209 significant GWAS hits (Table 1; Supplementary Data Files). In contrast, heritability  
210 tended to be much lower under aerobic compared to anaerobic conditions for both  
211 azithromycin and doxycycline, yielding significant GWAS hits only under anaerobic  
212 conditions (Table 1; Supplementary Data Files).

213 AMR genes identified by GWAS were diverse (Figure 4; Supplementary Data Files).  
214 These candidates included known AMR genes, such as *qnrVC* and *dfrA*, which were  
215 associated with ciprofloxacin resistance under both aerobic and anaerobic conditions.  
216 We identified seven genes associated with ciprofloxacin resistance under anaerobic  
217 conditions alone (including the stress response gene *barA* and a *radC* homolog involved  
218 in DNA repair), and ten genes under aerobic conditions alone (including *rtxB*). Under  
219 anaerobic conditions, most genes were identified at ciprofloxacin concentrations at or

220 above 0.25 µg/ml; however, four genes, including *barA*, were identified under one of the  
221 lowest tested ciprofloxacin concentrations (0.13 µg/ml). GWAS hits for azithromycin and  
222 doxycycline resistance were found only under anaerobic conditions. For azithromycin,  
223 two genetic elements were identified: *mphA* and a region between *ompT* and *dinG*  
224 (*ompT-dinG*). For doxycycline, 23 genes were shared across concentrations; however,  
225 the gene discovery rate was highest at the lower concentrations (n=53 at 0.13 µg/ml; n  
226 =26 µg/ml). GWAS hits included the major facilitator superfamily antibiotic efflux pump  
227 *tet(59)* (Figure 4, Supplementary Data Files). The majority of genetic elements identified  
228 have unknown function, yet the expected detection of known AMR genes suggests that  
229 the genes of unknown function may indeed play a role in AMR.

230 **Antibiotics detected in stool by LC-MS/MS.** A total of 196 antibiotics were detected in  
231 the 51 stool supernatants tested (Figure 5). At least one antibiotic was detected in 98%  
232 (n=50/51), at least two antibiotics were detected in 94% (n=48/51), and three or more  
233 antibiotics were detected in 90% (n=46/51) of stool supernatants (Figure 5). Antibiotics  
234 detected were ciprofloxacin (n=48/51; 94%), tetracycline / doxycycline (n=46/51; 90%),  
235 nalidixic acid (n=41/51; 80%), metronidazole (n=37/51; 73%), bactrim  
236 (sulfamethoxazole/trimethoprim; n=22/51; 43%), and amoxicillin (n=2/51; 4%);  
237 azithromycin was not detected. Detection of quinolone/fluoroquinolone and  
238 tetracycline/doxycycline in stool by LC-MS/MS was not associated with AMR genotypes  
239 or phenotypes (Supplementary Table 8). Associations for azithromycin could not be  
240 tested because azithromycin was not detected in any stool supernatant.

241

## 242 DISCUSSION

243 In this study, the rate of resistance among clinical isolates differed significantly when  
244 tested under aerobic versus anaerobic conditions. The extent to which isolates were  
245 resistant under anaerobic conditions differed by antibiotic class. The genetic basis of  
246 resistance was uniquely discoverable under anaerobic conditions, and also differed by  
247 antibiotic class. The approach of using AUC growth curve data as a dependent  
248 continuous variable for GWAS to identify AMR genetic elements under aerobic and  
249 anaerobic conditions may provide a new framework to investigate AMR.

250 The odds of classifying isolates as resistant under anaerobic conditions compared to  
251 aerobic conditions increased over 10 times for ciprofloxacin and over 200 times for  
252 azithromycin. These results are likely generalizable across *V. cholerae* taxa in that  
253 analysis of a second collection separated by more than 10 years found that the odds of  
254 classifying isolates as resistant under anaerobic conditions compared to aerobic  
255 conditions increased over 30 times for ciprofloxacin and over 100 times for  
256 azithromycin. Physiologic mechanisms for increased resistance to antibiotics under  
257 anaerobic conditions may include reduced growth velocity limiting the impact of agents  
258 that directly or indirectly disrupt cell envelope integrity. Additional mechanisms may  
259 include ROS that induce both intracellular and cell wall stress and can act  
260 synergistically to potentiate antibiotic lethality. The assays that utilized catalase to  
261 quench hydrogen peroxide were conducted to evaluate this possibility. The MIC for all  
262 three antibiotics did not increase with the addition of catalase suggesting that the  
263 reduction of ROS alone cannot account for increased MICs observed under anaerobic  
264 conditions.

265 Multiple knowledge gaps on the genetic basis of AMR remain. This study prioritized the  
266 factor of oxygen exposure as a determinant of AMR phenotype because facultative  
267 enteropathogens experience hypoxia and anoxia in the animal host. The first phase of  
268 the analysis focused on known AMR genotypes with known AMR phenotypes. For  
269 ciprofloxacin, mutations in *parC* and carriage of *qnr<sub>Vc</sub>* significantly associated with  
270 phenotypic resistance under aerobic and anaerobic conditions; mutations in *gyrA*  
271 significantly associated with resistant phenotypes under anaerobic conditions alone. For  
272 azithromycin, *mphA* was identified and significantly associated with AMR phenotypes  
273 under aerobic conditions alone. While *tet(59)* was identified, very few isolates were  
274 identified as resistant to doxycycline under aerobic (n=1) or anaerobic conditions (n=2).  
275 These data demonstrate that the relationship between AMR genotype and phenotype  
276 may differ between aerobic and anaerobic conditions.

277 The second phase of analysis sought to identify unknown genetic elements associated  
278 with AMR. Initial attempts to use categorical data (resistant vs sensitive) in the GWAS  
279 resulted in modest gene discovery rates (data not shown). To address this problem, the  
280 continuous variable of AUC strengthened the GWAS. Breakpoint and sub-breakpoint  
281 concentrations were chosen based on a rationale that different genetic elements might  
282 contribute differently to AMR phenotypes at different antibiotic concentrations. GWAS  
283 expectedly identified *qnr<sub>Vc</sub>* for ciprofloxacin exposure under aerobic and anaerobic  
284 conditions, *mphA* for azithromycin exposure under anaerobic conditions alone and  
285 *tet(59)* for doxycycline exposure under anaerobic conditions alone. The lack of detection  
286 of *mphA* under aerobic conditions by GWAS conflicted with the conventional analysis.  
287 For ciprofloxacin, seven genes were discovered in anaerobic conditions alone; these

288 included a homolog for DNA repair (*radC*), 2-component histidine kinase involved in  
289 stress response (*barA*), and an ATP-dependent zinc protease. The genes *dfrA31* and  
290 APH(6)-Id were identified for both aerobic and anaerobic conditions and encode a  
291 trimethoprim-resistant dihydrofolate reductase and a streptomycin phosphotransferase  
292 enzyme, respectively. These genes are located on SXT with *qnr<sub>Vc</sub>* and may therefore be  
293 associated due to genetic linkage rather than due to causal roles in ciprofloxacin  
294 resistance. For azithromycin, two genetic elements under anaerobic conditions alone  
295 were identified: *mphA* (mentioned above) and an intergenic region between *ompT*  
296 (porin; known to be associated with AMR)[43, 44] and *dinG* (ATP-dependent DNA  
297 helicase). For doxycycline, a diverse set of 57 genetic elements under anaerobic  
298 conditions alone were identified that included *tet(59)* (mentioned above), *vexK* (efflux  
299 RND transporter permease associated with AMR) [45-47], and *zorA* (anti-phage  
300 defense system ZorAB subunit A; a putative proton channel that may respond to  
301 membrane perturbation by depolarization)[48].

302 Genes associated with an AMR phenotype were found on SXT (e.g. *tet(59)*, *aph(6)-Id*,  
303 *radC*, *dfrA31*) and discovered on the Vibrio Pathogenicity Island II (VSP<sub>II</sub>; N16961  
304 VC0506-VC0512 / E7946 loci RS02705-RS02745); these loci are genetically diverse in  
305 Bangladesh[49]. The GWAS hits in VSP<sub>II</sub> encode both biofilm/ autoaggregation  
306 associated factors as well as an aerotaxis protein (AerB; VC0512)[50]; findings  
307 consistent with roles in AMR and aerobic/ anaerobic conditions. The GWAS were  
308 limited by sample size and were at risk of increased false positive discovery rates at  
309 AMR 'hot-spots' like SXT. Despite these limitations, GWAS enabled the discovery of an

310 intriguing list of genetic targets that were associated with AMR and require future  
311 molecular manipulation to test for causal relationships.

312 LC-MS/MS analysis on the stools, from which the isolates were obtained, was  
313 conducted to test the hypothesis that the rates of AMR genotypes and phenotypes were  
314 higher when the stool samples contained the cognate antibiotic. Nearly all patients shed  
315 at least one antibiotic making it difficult to identify AMR correlates to exposure.

## 316 **Conclusions**

317 Facultative enteropathogens are exposed to antibiotics under aerobic and anaerobic  
318 conditions in both the human gut and in the environment. We used the facultative  
319 enteropathogen *V. cholerae* as a model to test for differences in AMR phenotypes under  
320 aerobic and anaerobic conditions. The odds of classifying isolates as resistant under  
321 anaerobic compared to aerobic conditions increased over 10 times for two of the three  
322 antibiotics tested. While several known resistance genes were associated with AMR  
323 under both conditions, many genes were only associated with AMR under one  
324 condition. Heritability tended to be higher and more genes associated with resistance  
325 under anaerobic conditions, suggesting that key genetic determinants of resistance may  
326 be missed when experiments are only performed aerobically. Taken together, these  
327 findings challenge clinical and experimental paradigms of testing facultative  
328 enteropathogens for AMR under aerobic conditions alone.

329



## 330 **Acknowledgements**

331 We thank the patients for participating in this study and the icddr,b clinical and  
332 laboratory teams that collected the samples. We are grateful to Randy Autrey and Krista  
333 Berquist for their administrative expertise, as well as Glenn Morris at the Emerging  
334 Pathogens Institute and Desmond Schatz in the Department of Pediatrics at the  
335 University of Florida for their ongoing support. Stephen Calderwood, Jason Harris, and  
336 Regina LaRocque were the principal investigators (PI) of the parent study/IRB protocol  
337 (Massachusetts General Hospital, Harvard University School of Medicine, USA) under  
338 which the samples were collected by EJM when he was a NIH Fogarty Fellow. Andrew  
339 Camilli provided additional reagents and insights for this manuscript; FQ was the  
340 principal investigator in Bangladesh and PI of the ERC/RRC approvals at the icddr,b.  
341 This generous research infrastructure and support was invaluable to the success of this  
342 study.

## 343 **Data availability**

344 Data analyzed in the manuscript have been made available in the online supplementary  
345 material.

## 346 **Financial Support**

347 This work was supported by the National Institutes of Health grants to EJM  
348 [DP5OD019893, R21TW010182] and KBB [S10 OD021758-01A1] and internal support  
349 from the Emerging Pathogens Institute, and the Departments of Pediatrics and the  
350 Department of Environmental and Global Health at the University of Florida. BJS and  
351 MMS were supported by a Genome Canada and Genome Quebec Bioinformatics and

352 Computational Biology grant. ACM was supported in part by a grant from the Children's  
353 Miracle Network (Florida).

354 **Disclaimer**

355 The funders had no role in study design, data collection and analysis, decision to  
356 publish, or preparation of the manuscript.

357 **Potential conflicts of interest.**

358 All authors: No reported conflicts.

359 **FIGURES**  
 360  
 361 **FIGURE 1**

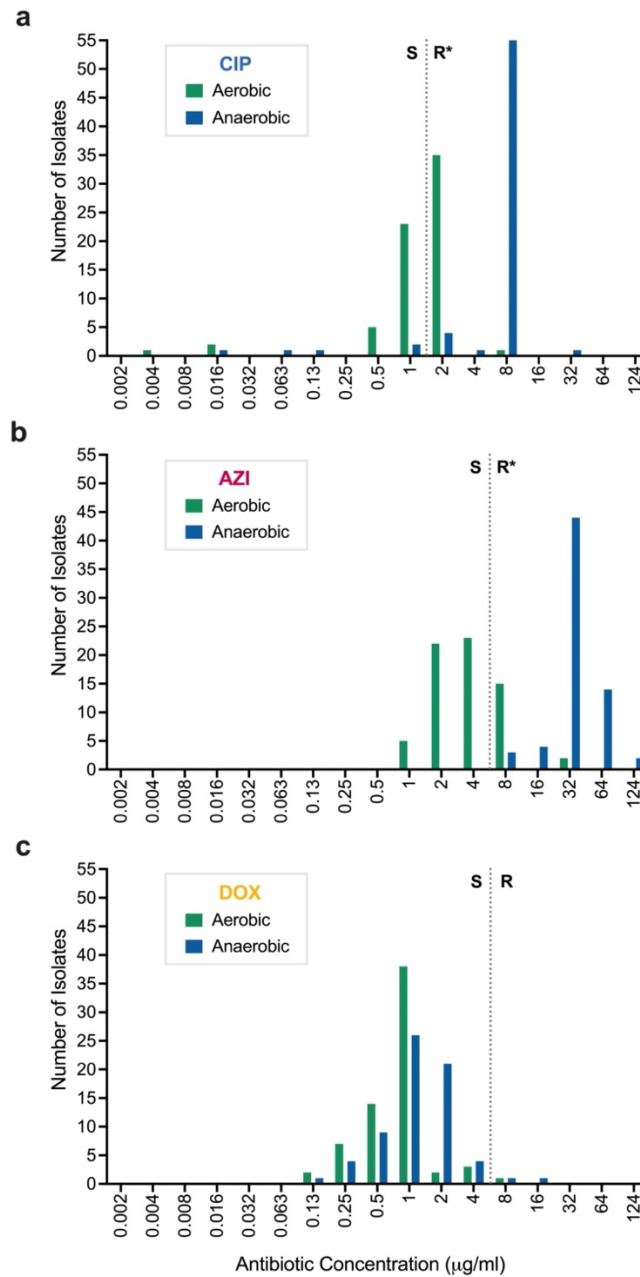

362

363 **Figure 1. Distribution of antibiotic resistance among clinical isolates under aerobic and anaerobic**  
 364 **conditions.** Ciprofloxacin (CIP; **a**), Azithromycin (AZI; **b**), and Doxycycline (DOX; **c**). Resistance was  
 365 determined by MIC under aerobic (green) and anaerobic conditions (blue). Data are from 67 human-shed  
 366 *V. cholerae* isolates. Dotted line is the breakpoint for resistance per CLSI standards which is based on  
 367 assays under aerobic conditions (CIP = 2  $\mu\text{g/ml}$ ; AZI = 8  $\mu\text{g/ml}$ ; DOX = 8  $\mu\text{g/ml}$ ). “\*” represents a  
 368 significant difference in the frequency of isolates identified as resistant to ciprofloxacin and azithromycin  
 369 by McNemar’s test (both  $p < 0.001$ ). S=sensitive. R = Resistant.

370 **FIGURE 2**

371

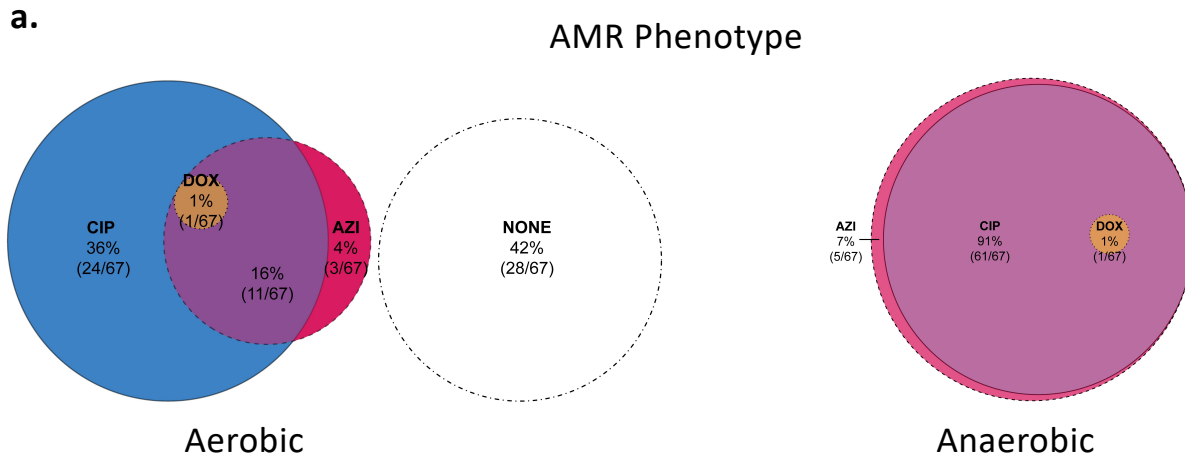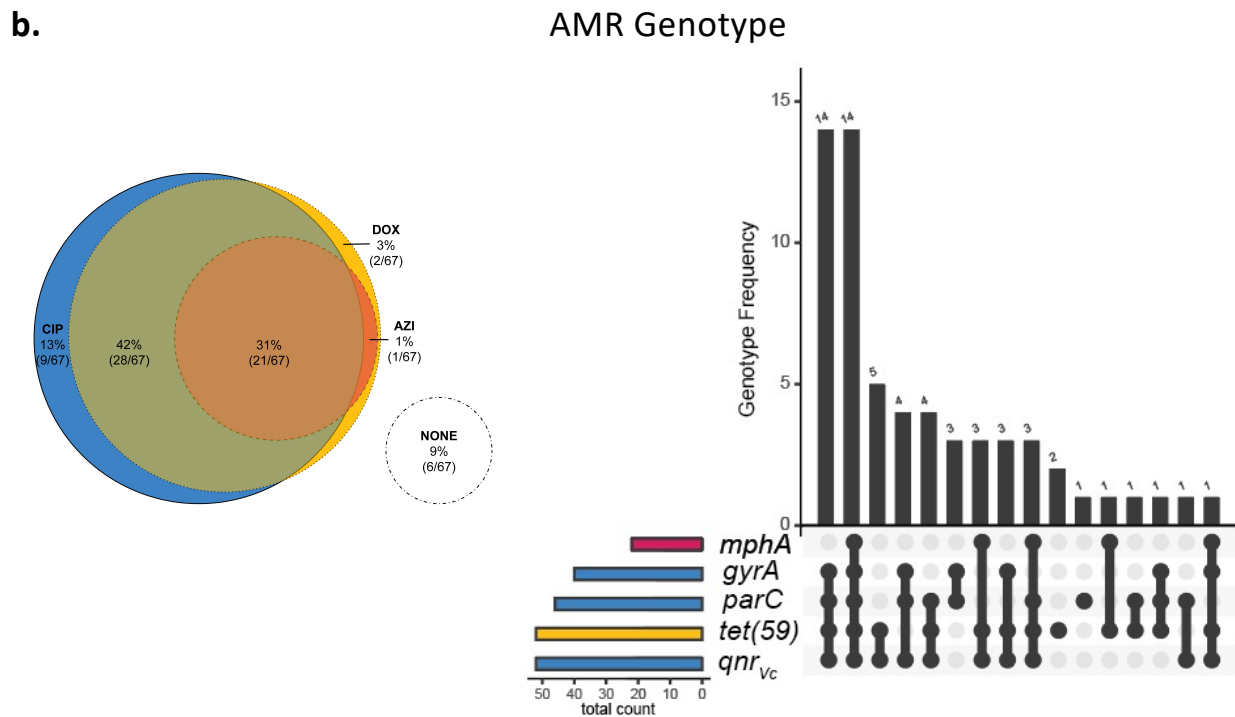

372

373

374

375

376

377

**Figure 2. AMR phenotypes and known AMR genetic elements in human-shed *V. cholerae* isolates.**  
**a,** Proportional Venn diagram (Euler) of AMR phenotypes to azithromycin (AZI), doxycycline (DOX) and/or ciprofloxacin (CIP) under aerobic (left) and anaerobic conditions (right). **b,** Distribution of specific known AMR genetic elements by proportional Venn diagram (Euler; left) and bar chart (right). AMR genetic elements to other antibiotics are not shown.

378 **FIGURE 3**

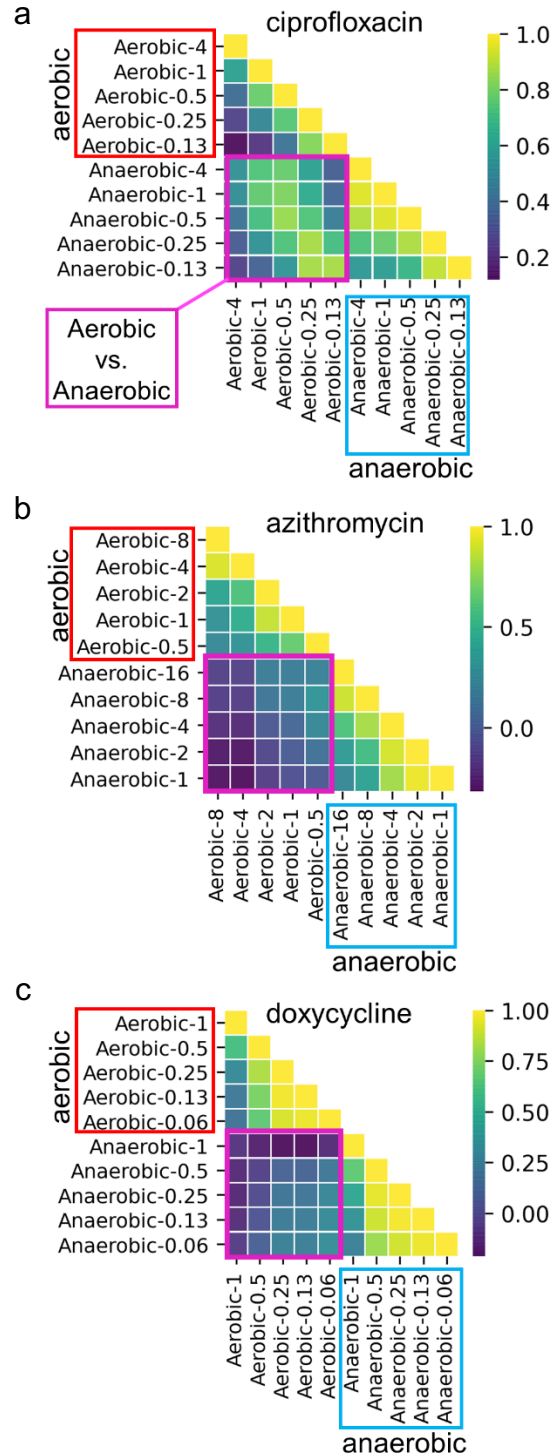

379  
 380 **Figure 3. Correlations among *V. cholerae* growth phenotypes at different concentration of**  
 381 **antibiotics and respiratory conditions.** Correlations of *V. cholerae* growth phenotypes (AUC) to  
 382 ciprofloxacin (CIP; **a**), azithromycin (AZI; **b**), and doxycycline (DOX; **c**) at different antibiotic  
 383 concentrations under aerobic and anaerobic conditions (e.g., “Anaerobic-0.06”). Heatmaps show  
 384 correlation coefficients (scale bar is to right).  
 385



395 **FIGURE 5.**

|              | CIP | TET/DOX | NAL | MET | BAC | AMO | AZI | ERY | CEF | Detected (N)           |
|--------------|-----|---------|-----|-----|-----|-----|-----|-----|-----|------------------------|
| EN123        | +   | +       | +   | +   | +   | +   | -   | -   | -   | 6                      |
| EN160        | +   | +       | +   | +   | +   | +   | -   | -   | -   | 6                      |
| EN127        | +   | +       | +   | +   | +   | -   | -   | -   | -   | 5                      |
| EN129        | +   | +       | +   | +   | +   | -   | -   | -   | -   | 5                      |
| EN135        | +   | +       | +   | +   | -   | -   | -   | -   | -   | 4                      |
| EN149        | +   | +       | +   | +   | +   | -   | -   | -   | -   | 5                      |
| EN153        | +   | +       | +   | +   | +   | -   | -   | -   | -   | 5                      |
| EN162        | +   | +       | +   | +   | +   | -   | -   | -   | -   | 5                      |
| EN164        | +   | +       | +   | +   | +   | -   | -   | -   | -   | 5                      |
| EN166        | +   | +       | +   | +   | +   | -   | -   | -   | -   | 5                      |
| EN168        | +   | +       | +   | +   | +   | -   | -   | -   | -   | 5                      |
| EN178        | +   | +       | +   | +   | +   | -   | -   | -   | -   | 5                      |
| EN182        | +   | +       | +   | +   | +   | -   | -   | -   | -   | 5                      |
| EN183        | +   | +       | +   | +   | +   | -   | -   | -   | -   | 5                      |
| EN185        | +   | +       | +   | +   | +   | -   | -   | -   | -   | 5                      |
| EN188        | +   | +       | +   | +   | +   | -   | -   | -   | -   | 5                      |
| EN071        | +   | +       | -   | +   | +   | -   | -   | -   | -   | 4                      |
| EN078        | +   | +       | +   | -   | +   | -   | -   | -   | -   | 4                      |
| EN079        | +   | +       | +   | +   | -   | -   | -   | -   | -   | 4                      |
| EN125        | +   | +       | +   | -   | +   | -   | -   | -   | -   | 4                      |
| EN143        | +   | +       | +   | -   | -   | -   | -   | -   | -   | 3                      |
| EN144        | +   | +       | +   | +   | -   | -   | -   | -   | -   | 4                      |
| EN145        | +   | +       | +   | +   | -   | -   | -   | -   | -   | 4                      |
| EN148        | +   | +       | +   | +   | -   | -   | -   | -   | -   | 4                      |
| EN150        | +   | +       | +   | +   | -   | -   | -   | -   | -   | 4                      |
| EN155        | +   | +       | +   | +   | -   | -   | -   | -   | -   | 4                      |
| EN156        | +   | +       | -   | +   | +   | -   | -   | -   | -   | 4                      |
| EN159        | +   | +       | +   | -   | +   | -   | -   | -   | -   | 4                      |
| EN165        | +   | +       | +   | +   | -   | -   | -   | -   | -   | 4                      |
| EN167        | +   | +       | +   | +   | -   | -   | -   | -   | -   | 4                      |
| EN169        | +   | +       | +   | +   | -   | -   | -   | -   | -   | 4                      |
| EN171        | +   | +       | -   | +   | +   | -   | -   | -   | -   | 4                      |
| EN174        | +   | +       | +   | -   | +   | -   | -   | -   | -   | 4                      |
| EN181        | +   | +       | +   | +   | -   | -   | -   | -   | -   | 4                      |
| EN184        | +   | +       | +   | +   | -   | -   | -   | -   | -   | 4                      |
| EN189        | +   | +       | +   | +   | -   | -   | -   | -   | -   | 4                      |
| EN018        | +   | +       | -   | +   | -   | -   | -   | -   | -   | 3                      |
| EN026        | +   | +       | -   | -   | -   | -   | -   | -   | -   | 3                      |
| EN027        | +   | +       | -   | +   | -   | -   | -   | -   | -   | 3                      |
| EN095        | +   | +       | +   | -   | -   | -   | -   | -   | -   | 3                      |
| EN096        | +   | +       | +   | -   | -   | -   | -   | -   | -   | 3                      |
| EN133        | +   | +       | +   | -   | -   | -   | -   | -   | -   | 3                      |
| EN134        | +   | +       | +   | -   | -   | -   | -   | -   | -   | 3                      |
| EN141        | +   | +       | +   | -   | -   | -   | -   | -   | -   | 3                      |
| EN147        | +   | +       | +   | -   | -   | -   | -   | -   | -   | 3                      |
| EN191        | +   | +       | -   | +   | -   | -   | -   | -   | -   | 3                      |
| EN072        | +   | -       | -   | +   | -   | -   | -   | -   | -   | 2                      |
| EN173        | +   | -       | -   | +   | -   | -   | -   | -   | -   | 2                      |
| EN137        | -   | -       | +   | -   | -   | -   | -   | -   | -   | 1                      |
| EN146        | -   | -       | +   | -   | -   | -   | -   | -   | -   | 1                      |
| EN132        | -   | -       | -   | -   | -   | -   | -   | -   | -   | 0                      |
| Detected (N) | 48  | 46      | 41  | 37  | 22  | 2   | 0   | 0   | 0   | 196 total detected     |
| Positive (%) | 94  | 90      | 80  | 73  | 43  | 4   | 0   | 0   | 0   | 98% with antibiotic(s) |

396  
397  
398 **Figure 5. Antibiotic detection in stool supernatants by mass spectrometry (LC-MS/MS).** Green with  
399 "+" = Detected. White with "-" = not detected. CIP= ciprofloxacin, TET/DOX= tetracycline and/or  
400 doxycycline, NAL = nalidixic acid, MET = metronidazole, BAC = sulfamethoxazole and/or trimethoprim,  
401 AMO = amoxicillin, ERY = erythromycin, CEF = ceftriaxone. Stool supernatants were not available for  
402 EN80, 86, 88, 92, 100, 103, 109, 116-120, 126, 124, 130, 131.

403 **TABLE**

404

405

406 **Table 1.** Identification of genetic elements by GWAS that associate with AMR.

| Condition                  |                                | Outcome <sup>b</sup> | Antibiotic Concentration (µg/ml) |        |         |         |         |
|----------------------------|--------------------------------|----------------------|----------------------------------|--------|---------|---------|---------|
| Ciprofloxacin <sup>a</sup> |                                |                      | CIP4                             | CIP1   | CIP0.5  | CIP0.25 | CIP0.13 |
| Aerobic                    | Heritability (h <sup>2</sup> ) | 0.99                 | 0.73                             | 0.60   | 0.74    | 0.92    |         |
|                            | Associated genes               | 0                    | 11                               | 9      | 2       | 6       |         |
| Anaerobic                  | Heritability (h <sup>2</sup> ) | 0.81                 | 0.73                             | 0.72   | 0.72    | 0.87    |         |
|                            | Associated genes               | 8                    | 8                                | 8      | 10      | 4       |         |
| Azithromycin <sup>a</sup>  |                                |                      | AZI16                            | AZI8   | AZI4    | AZI2    | AZI1    |
| Aerobic                    | Heritability (h <sup>2</sup> ) | -                    | 0.00                             | 0.02   | 0.00    | 0.11    |         |
|                            | Associated genes               | -                    | -                                | -      | -       | -       |         |
| Anaerobic                  | Heritability (h <sup>2</sup> ) | 0.30                 | 0.77                             | 0.66   | 0.38    | 0.00    |         |
|                            | Associated genes               | 2                    | 1                                | 0      | 0       | -       |         |
| Doxycycline <sup>a</sup>   |                                |                      | DOX1                             | DOX0.5 | DOX0.25 | DOX0.13 | DOX0.06 |
| Aerobic                    | Heritability (h <sup>2</sup> ) | 0.00                 | 0.27                             | 0.23   | 0.30    | 0.50    |         |
|                            | Associated genes               | -                    | 0                                | 0      | 0       | 0       |         |
| Anaerobic                  | Heritability (h <sup>2</sup> ) | 0.10                 | 0.61                             | 0.72   | 0.72    | 0.77    |         |
|                            | Associated genes               | 0                    | 23                               | 55     | 54      | 17      |         |

407 <sup>a</sup> Ciprofloxacin = CIP; Azithromycin = AZI; Doxycycline = DOX

408 <sup>b</sup> Heritability is the proportion of phenotypic variation that is explained by genetic variation. Associated  
 409 genes are all significant GWAS hits after correction for multiple hypothesis testing ( $P < 0.05$  after  
 410 Bonferroni correction).

411



412 **REFERENCES**

- 413 1. Performance Standards for Antimicrobial Susceptibility Testing. 27th ed. Wayne, PA  
414 (USA): Clinical and Laboratory Standards Institute (CLSI), **2017** CLSI supplement  
415 M100).
- 416 2. Bueno E, Sit B, Waldor MK, Cava F. Genetic Dissection of the Fermentative and  
417 Respiratory Contributions Supporting *Vibrio cholerae* Hypoxic Growth. J Bacteriol **2020**;  
418 202.
- 419 3. Bueno E, Pinedo V, Cava F. Adaptation of *Vibrio cholerae* to Hypoxic Environments.  
420 Front Microbiol **2020**; 11:739.
- 421 4. Xu Q, Dziejman M, Mekalanos JJ. Determination of the transcriptome of *Vibrio*  
422 *cholerae* during intrainestinal growth and midexponential phase in vitro. Proc Natl Acad  
423 Sci U S A **2003**; 100:1286-91.
- 424 5. Mandlik A, Livny J, Robins WP, Ritchie JM, Mekalanos JJ, Waldor MK. RNA-Seq-  
425 based monitoring of infection-linked changes in *Vibrio cholerae* gene expression. Cell  
426 Host Microbe **2011**; 10:165-74.
- 427 6. Beaber JW, Hochhut B, Waldor MK. SOS response promotes horizontal  
428 dissemination of antibiotic resistance genes. Nature **2004**; 427:72-4.
- 429 7. Narendrakumar L, Gupta SS, Johnson JB, Ramamurthy T, Thomas S. Molecular  
430 Adaptations and Antibiotic Resistance in *Vibrio cholerae*: A Communal Challenge.  
431 Microb Drug Resist **2019**; 25:1012-22.
- 432 8. Das B, Verma J, Kumar P, Ghosh A, Ramamurthy T. Antibiotic resistance in *Vibrio*  
433 *cholerae*: Understanding the ecology of resistance genes and mechanisms. Vaccine  
434 **2020**; 38 Suppl 1:A83-A92.

- 435 9. The treatment of diarrhoea -- A manual for physicians and other senior health  
436 workers. —4th rev. 4th Rev. ed. Vol. WHO/CAH/03.7. Geneva, Switzerland: World  
437 Heath Organization.
- 438 10. Nelson EJ, Nelson DS, Salam MA, Sack DA. Antibiotics for both moderate and  
439 severe cholera. *N Engl J Med* **2011**; 364:5-7.
- 440 11. Leibovici-Weissman Y, Neuberger A, Bitterman R, Sinclair D, Salam MA, Paul M.  
441 Antimicrobial drugs for treating cholera. *Cochrane Database Syst Rev* **2014**:CD008625.
- 442 12. Khan AI, Mack JA, Salimuzzaman M, et al. Electronic decision-support improves  
443 diarrhoeal disease guideline adherence (mHealth Diarrhoea Management, mHDM,  
444 Trial): a cluster randomized controlled trial. *Lancet DH* **2020**; 2:e250-8.
- 445 13. Biswas D, Hossin R, Rahman M, et al. An ethnographic exploration of diarrheal  
446 disease management in public hospitals in Bangladesh: From problems to solutions.  
447 *Soc Sci Med* **2020**; 260:113185.
- 448 14. Ingle DJ, Levine MM, Kotloff KL, Holt KE, Robins-Browne RM. Dynamics of  
449 antimicrobial resistance in intestinal *Escherichia coli* from children in community settings  
450 in South Asia and sub-Saharan Africa. *Nat Microbiol* **2018**; 3:1063-73.
- 451 15. Towner KJ, Pearson NJ, Mhalu FS, O'Grady F. Resistance to antimicrobial agents  
452 of *Vibrio cholerae* E1 Tor strains isolated during the fourth cholera epidemic in the  
453 United Republic of Tanzania. *Bull World Health Organ* **1980**; 58:747-51.
- 454 16. Burrus V, Marrero J, Waldor MK. The current ICE age: biology and evolution of  
455 SXT-related integrating conjugative elements. *Plasmid* **2006**; 55:173-83.
- 456 17. Hooper DC, Jacoby GA. Topoisomerase Inhibitors: Fluoroquinolone Mechanisms of  
457 Action and Resistance. *Cold Spring Harb Perspect Med* **2016**; 6.

- 458 18. Garriss G, Waldor MK, Burrus V. Mobile antibiotic resistance encoding elements  
459 promote their own diversity. *PLoS Genet* **2009**; 5:e1000775.
- 460 19. Fonseca EL, Dos Santos Freitas F, Vieira VV, Vicente AC. New *qnr* gene cassettes  
461 associated with superintegron repeats in *Vibrio cholerae* O1. *Emerg Infect Dis* **2008**;  
462 14:1129-31.
- 463 20. Fyfe C, Grossman TH, Kerstein K, Sutcliffe J. Resistance to Macrolide Antibiotics in  
464 Public Health Pathogens. *Cold Spring Harb Perspect Med* **2016**; 6.
- 465 21. Grossman TH. Tetracycline Antibiotics and Resistance. *Cold Spring Harb Perspect*  
466 *Med* **2016**; 6:a025387.
- 467 22. Dorr T, Delgado F, Umans BD, Gerding MA, Davis BM, Waldor MK. A Transposon  
468 Screen Identifies Genetic Determinants of *Vibrio cholerae* Resistance to High-  
469 Molecular-Weight Antibiotics. *Antimicrob Agents Chemother* **2016**; 60:4757-63.
- 470 23. Kohanski MA, Dwyer DJ, Hayete B, Lawrence CA, Collins JJ. A common  
471 mechanism of cellular death induced by bactericidal antibiotics. *Cell* **2007**; 130:797-810.
- 472 24. Dwyer DJ, Belenky PA, Yang JH, et al. Antibiotics induce redox-related  
473 physiological alterations as part of their lethality. *Proc Natl Acad Sci U S A* **2014**;  
474 111:E2100-9.
- 475 25. Staerck C, Gastebois A, Vandeputte P, et al. Microbial antioxidant defense  
476 enzymes. *Microb Pathog* **2017**; 110:56-65.
- 477 26. Smirnova G, Muzyka N, Oktyabrsky O. Transmembrane glutathione cycling in  
478 growing *Escherichia coli* cells. *Microbiol Res* **2012**; 167:166-72.

- 479 27. Bryan LE, Kwan S. Mechanisms of aminoglycoside resistance of anaerobic bacteria  
480 and facultative bacteria grown anaerobically. *J Antimicrob Chemother* **1981**; 8 Suppl  
481 D:1-8.
- 482 28. Bryan LE. General mechanisms of resistance to antibiotics. *J Antimicrob Chemother*  
483 **1988**; 22 Suppl A:1-15.
- 484 29. Bryant RE, Fox K, Oh G, Morthland VH. Beta-lactam enhancement of  
485 aminoglycoside activity under conditions of reduced pH and oxygen tension that may  
486 exist in infected tissues. *J Infect Dis* **1992**; 165:676-82.
- 487 30. Dwyer DJ, Kohanski MA, Hayete B, Collins JJ. Gyrase inhibitors induce an oxidative  
488 damage cellular death pathway in *Escherichia coli*. *Mol Syst Biol* **2007**; 3:91.
- 489 31. Hong Y, Li Q, Gao Q, et al. Reactive oxygen species play a dominant role in all  
490 pathways of rapid quinolone-mediated killing. *J Antimicrob Chemother* **2020**; 75:576-85.
- 491 32. Luan G, Hong Y, Drlica K, Zhao X. Suppression of Reactive Oxygen Species  
492 Accumulation Accounts for Paradoxical Bacterial Survival at High Quinolone  
493 Concentration. *Antimicrob Agents Chemother* **2018**; 62.
- 494 33. Zhao X, Drlica K. Reactive oxygen species and the bacterial response to lethal  
495 stress. *Curr Opin Microbiol* **2014**; 21:1-6.
- 496 34. Nelson EJ, Chowdhury A, Harris JB, et al. Complexity of rice-water stool from  
497 patients with *Vibrio cholerae* plays a role in the transmission of infectious diarrhea. *Proc*  
498 *Natl Acad Sci U S A* **2007**; 104:19091-6.
- 499 35. Sprouffske K, Wagner A. Growthcurver: an R package for obtaining interpretable  
500 metrics from microbial growth curves. *BMC Bioinformatics* **2016**; 17:172.

- 501 36. McArthur AG, Waglechner N, Nizam F, et al. The comprehensive antibiotic  
502 resistance database. *Antimicrob Agents Chemother* **2013**; 57:3348-57.
- 503 37. Zankari E. Comparison of the web tools ARG-ANNOT and ResFinder for detection  
504 of resistance genes in bacteria. *Antimicrob Agents Chemother* **2014**; 58:4986.
- 505 38. Alexandrova L, Haque F, Rodriguez P, et al. Identification of widespread antibiotic  
506 exposure in cholera patients correlates with clinically relevant microbiota changes. *J*  
507 *Infect Dis* **2019**.
- 508 39. Leclercq SO, Wang C, Zhu Y, et al. Diversity of the Tetracycline Mobilome within a  
509 Chinese Pig Manure Sample. *Appl Environ Microbiol* **2016**; 82:6454-62.
- 510 40. Grossman TH, Starosta AL, Fyfe C, et al. Target- and resistance-based mechanistic  
511 studies with TP-434, a novel fluorocycline antibiotic. *Antimicrob Agents Chemother*  
512 **2012**; 56:2559-64.
- 513 41. Noguchi N, Emura A, Matsuyama H, O'Hara K, Sasatsu M, Kono M. Nucleotide  
514 sequence and characterization of erythromycin resistance determinant that encodes  
515 macrolide 2'-phosphotransferase I in *Escherichia coli*. *Antimicrob Agents Chemother*  
516 **1995**; 39:2359-63.
- 517 42. Chesneau O, Tsvetkova K, Courvalin P. Resistance phenotypes conferred by  
518 macrolide phosphotransferases. *FEMS Microbiol Lett* **2007**; 269:317-22.
- 519 43. Mathur J, Waldor MK. The *Vibrio cholerae* ToxR-regulated porin OmpU confers  
520 resistance to antimicrobial peptides. *Infect Immun* **2004**; 72:3577-83.
- 521 44. Li CC, Crawford JA, DiRita VJ, Kaper JB. Molecular cloning and transcriptional  
522 regulation of *ompT*, a ToxR-repressed gene in *Vibrio cholerae*. *Mol Microbiol* **2000**;  
523 35:189-203.

- 524 45. Buckley AM, Webber MA, Cooles S, et al. The AcrAB-TolC efflux system of  
525 *Salmonella enterica* serovar Typhimurium plays a role in pathogenesis. *Cell Microbiol*  
526 **2006**; 8:847-56.
- 527 46. Taylor DL, Bina XR, Bina JE. *Vibrio cholerae* VexH encodes a multiple drug efflux  
528 pump that contributes to the production of cholera toxin and the toxin co-regulated pilus.  
529 *PLoS One* **2012**; 7:e38208.
- 530 47. Bina XR, Philippart JA, Bina JE. Effect of the efflux inhibitors 1-(1-naphthylmethyl)-  
531 piperazine and phenyl-arginine-beta-naphthylamide on antimicrobial susceptibility and  
532 virulence factor production in *Vibrio cholerae*. *J Antimicrob Chemother* **2009**; 63:103-8.
- 533 48. Doron S, Melamed S, Ofir G, et al. Systematic discovery of antiphage defense  
534 systems in the microbial pangenome. *Science* **2018**; 359.
- 535 49. Baddam R, Sarker N, Ahmed D, et al. Genome Dynamics of *Vibrio cholerae* Isolates  
536 Linked to Seasonal Outbreaks of Cholera in Dhaka, Bangladesh. *mBio* **2020**; 11.
- 537 50. Murphy SG, Johnson BA, Ledoux CM, Dörr T. *Vibrio cholerae*'s mysterious Seventh  
538 Pandemic island (VSP-II) encodes novel Zur-regulated zinc starvation genes involved in  
539 chemotaxis and autoaggregation. *bioRxiv* **2021**:2021.03.09.434465.
- 540

1 **SUPPLEMENTARY MATERIAL**

2 **Table of Contents**

3 **Supplementary Methods**..... 2

4 **Supplementary Results**..... 5

5 **Supplementary Table 1. Reference strains and clinical isolates**..... 7

6 **Supplementary Table 2. Baseline growth parameters of *V. cholerae* clinical isolates**

7 **under aerobic and anaerobic conditions** ..... 9

8 **Supplementary Table 3. Minimal inhibitory concentrations (MICs) for ciprofloxacin,**

9 **azithromycin, and doxycycline among *V. cholerae* clinical isolates** ..... 10

10 **Supplementary Table 4. Comparison of rates of resistance detected under aerobic**

11 **versus anaerobic conditions among *V. cholerae* clinical isolates in the primary collection**

12 **..... 11**

13 **Supplementary Table 5. Comparison of rates of resistance detected under aerobic**

14 **versus anaerobic conditions among *V. cholerae* clinical isolates in the secondary**

15 **collection** ..... 11

16 **Supplementary Table 6. Effect of catalase on growth parameters for *V. cholerae***

17 ***E7946* and *EN160* under aerobic conditions**..... 12

18 **Supplementary Table 7. Comparison of antibiotic resistance phenotypes and known**

19 **resistance genotypes among *V. cholerae* clinical isolates** ..... 13

20 **Supplementary Table 8. Test of association between antibiotic detection by mass**

21 **spectrometry and AMR genotypes and phenotypes among *V. cholerae* clinical isolates**

22 **..... 14**

23 **Supplementary References**..... 15

24

25

26 **Supplementary Data Files (excel file with four datafile tabs)**

27

28 Date File S1. GWAS Hits. Ciprofloxacin resistance phenotype. Aerobic.

29 Date File S2. GWAS Hits. Ciprofloxacin resistance phenotype. Anaerobic.

30 Data File S3. GWAS Hits. Azithromycin resistance phenotype. Anaerobic.

31 Data File S4. GWAS Hits. Doxycycline resistance phenotype. Anaerobic.

32

### 33 **Supplementary Methods.**

34

35 **Whole-genome sequencing.** Genomic DNA was extracted from *V. cholerae* isolates  
36 from the primary collection using the Qiagen DNeasy Blood and Tissue Kit. Library  
37 construction was completed using the Illumina Nextera XT v.2 DNA Library Preparation  
38 Kit. Twenty-four genomes were pooled and sequenced on an Illumina MiSeq for 500  
39 cycles per run. Using CLC Genomics Workbench v20, raw reads were filtered by length,  
40 trimmed, and mapped to the reference genome (*V. cholerae* O1 El Tor E7946) to  
41 identify single-nucleotide variants. To identify genes not present in the reference  
42 genome, contigs were assembled *de novo* using CLC Genomics Workbench v20.

43 **Genome-wide association studies (GWAS).** To extract genomic variants, which can  
44 potentially capture all sources of variation in the genome (i.e. single nucleotide variants,  
45 indels and gene presence/absence) without *a priori* assumption about the underlying  
46 gene content of each sample (e.g. accessory genes or plasmids), unitigs were  
47 generated from genomes assembled using GATB[1]. Unitigs are sequences of variable  
48 length (unlike k-mers of fixed length  $k$ ) which represent the variations in the population  
49 of genomes under study in high-resolution. GWAS were performed using linear mixed  
50 models implemented in pyseer v.1.3.6 and adjusted for population stratification using  
51 the kinship matrix estimated from the phylogenetic tree[2].

52 To generate the phylogenetic tree, genome alignments consisting entirely of variable  
53 nucleotides were produced from whole genome SNP data generated by CLC Genomics  
54 Workbench v20 using VCF-kit 0.1.6[3]. The tree was then inferred by RaxML under the  
55 general time reversible (GTR) model with rate variation across sites following a GAMMA  
56 distribution[4]. We used the linear-mixed model approach to adjust for population



57 stratification and linkage disequilibrium in microbial GWAS[5]. Heritability ( $h^2$ ), an  
58 estimate of the proportion of the phenotype variance that can be explained by total  
59 genomic variation represented in the unitigs, was also calculated using pyseer v.1.3.6.  
60 Likelihood-ratio test  $p$ -values for the association tests were adjusted for multiple-testing  
61 by Bonferroni correction (at a genome-wide false discovery rate of 0.05) for the number  
62 of unique unitig patterns (i.e. only giving one count to a unitig with an identical  
63 presence/absence profile across genomes). We also removed unitigs tagged with the  
64 errors 'bad-chisq', 'pre-filtering-failed', 'lrt-filtering-failed', 'firth-fail' and 'matrix-  
65 inversionerror' after the analysis. To further remove false positive GWAS hits, we  
66 removed any considerable clusters of unitigs (> 20) with identical  $p$ -values, as these are  
67 likely to be lineage-specific markers or markers with strong linkage disequilibrium  
68 comprised of mostly non-causal variants linked on the same clonal frame. GWAS hits  
69 were annotated by mapping the unitigs to two reference genomes of *V. cholerae*,  
70 namely, E7946 (NCBI assembly accession number: GCA\_002749635.1) and O1  
71 biotype El Tor strain N16961 (NCBI assembly accession number: GCA\_003063785.1)  
72 using BWA. Statistically significant GWAS hits were further annotated with the CARD  
73 resistance gene identifier (RGI) after filtering the 'loose' hits and hits with identity <0.90.

#### 74 **Antibiotic detection by liquid chromatography mass spectrometry (LC-MS/MS).**

75 Stool supernatant from the primary collection were obtained by centrifugation and  
76 filtration (0.2  $\mu$ M surfactant-free cellulose acetate; Thermo Scientific Nalgene). Proteins  
77 were precipitated (1:7 ratio (v/v) of water::methanol). Supernatants were diluted with  
78 methanol and water (1:1 v/v) in 0.1% formic acid for liquid chromatography, and 5  $\mu$ l of  
79 supernatant was injected for analysis. LC/MSMS was performed on a 2.1 x 150-mm

80 Hypersil Gold aQ column (particle size, 3  $\mu\text{m}$ ) using a high-performance liquid  
81 chromatography system (Thermo UltiMate 3000 series) with an LTQ XL ion trap mass  
82 spectrometer (Thermo Fisher Scientific). Mobile phases were 1% formic acid in water  
83 (A) and 1% formic acid in methanol (B) and held at a constant 5%B for 2min before  
84 ramping to 95%B at 15 min where it was held for an additional minute before returning  
85 to starting conditions for a total run time of 25 min.

86 Eluent was ionized using electrospray ionization (ESI) in positive mode at a spray  
87 voltage of 5 kV, a nitrogen sheath gas flow rate of 8 L  $\text{min}^{-1}$ , and capillary temperature  
88 of 300°C. Two scan events were programmed to perform an initial scan from  $m/z$  100 to  
89 1000, which was followed by targeted collision induced dissociation based on a  
90 retention time and mass list. Retention time windows ranged from 0.35 minutes to 6.50  
91 min, depending on the elution range of the standards at high and low concentrations.  
92 Masses were targeted for the most abundant adduct or ion associated with each  
93 antibiotic (typically the  $[\text{M}+\text{H}]^+$  ion) with a  $m/z$  1 window. Data analysis for amoxicillin,  
94 sulfamethoxazole/trimethoprim, azithromycin, tetracycline, doxycycline, metronidazole,  
95 nalidixic acid, and ciprofloxacin was performed manually using extracted ion  
96 chromatograms and MSMS matching with an in-house antibiotic MSMS library using  
97 Xcalibur 2.2 SP 1.48 (Thermo Fisher Scientific).

98

99 **Supplementary Results.**

100  
101 **Antibiotic resistance phenotypes of known AMR genetic elements under aerobic**  
102 **and anaerobic conditions.** The distribution of known AMR genetic elements (Figure 2)  
103 was grouped by point mutations (likely transmitted vertically, not on an established  
104 mobilizable element) and horizontal transmission (on an established mobilizable  
105 element).

106 *Point mutations in known AMR genes.* For ciprofloxacin, the most identified known  
107 resistance mutations were those in the topoisomerase encoding genes *gyrA*  
108 (VC1258/RS06370) (Ser83Ile) and *parC* (VC2430/RS12340) (Ser85Leu). These were  
109 present in 60% (40/67) and 70% (47/67) of all isolates, while 54% (36/57) contained  
110 both. For azithromycin, we found no mutations in known resistance genes encoding  
111 ribosomal proteins L4 (*rplD*;VC2595/RS13175) and L22 (*rplV*;VC2591/RS13155) [6, 7].  
112 For tetracycline (proxy for doxycycline), one of the 9 total 16S rRNA genes (VCr001)  
113 was found to have a single nucleotide insertion of a G nucleotide at position 327 within  
114 the sequences of 15% (10/67) of isolates; the significance is unknown. No mutations  
115 were detected in the 30S ribosomal protein encoded by genes *rpsJ* (VC2597/RS13185)  
116 or *rpsC* (VC2590/RS13150), whose mutations have been associated with tetracycline  
117 class resistance in other Gram negative organisms [8-10].

118 *Known AMR genes on mobile genetic elements.* The integrative conjugative element  
119 (ICE) SXT/R391 was found in 90% (60/67) of isolates. The ICE contained a  
120 pentapeptide repeat protein conferring fluoroquinolone resistance (*qnr<sub>Vc</sub>*), a macrolide-  
121 inactivating phosphotransferase (*mph(A)*), and a major facilitator superfamily (MFS)  
122 efflux pump conferring tetracycline resistance (*tet(59)*) [11-14]. The genes *qnr<sub>Vc</sub>*,

123 *mph(A)*, and *tet(59)* were also found in 78% (52/67), 33% (22/67), and 78% (52/67) of  
124 isolates, respectively.

125

126

127 **Supplementary Table 1. Reference strains and clinical isolates**

128

|                          | Strain <sup>a</sup> | Aerobic <sup>b</sup> |                  |                  | Anaerobic <sup>b</sup> |                  |                  | Source <sup>c</sup> |
|--------------------------|---------------------|----------------------|------------------|------------------|------------------------|------------------|------------------|---------------------|
|                          |                     | CIP <sup>R</sup>     | AZI <sup>R</sup> | DOC <sup>R</sup> | CIP <sup>R</sup>       | AZI <sup>R</sup> | DOX <sup>R</sup> |                     |
| <u>Reference</u>         | E7946               | +                    | -                | -                | +                      | -                | -                | (1)                 |
| <u>Clinical Isolates</u> |                     |                      |                  |                  |                        |                  |                  |                     |
| EN018                    | L_EN1286            | -                    | -                | -                | -                      | +                | -                | (2)                 |
| EN026                    | L_EN1291            | -                    | -                | -                | -                      | +                | -                | (2)                 |
| EN027                    | L_EN1292            | -                    | -                | -                | -                      | +                | -                | (2)                 |
| EN071                    | L_EN1300            | +                    | -                | -                | +                      | +                | -                | (2)                 |
| EN072                    | L_EN1301            | -                    | -                | -                | +                      | +                | -                | (2)                 |
| EN078                    | L_EN1303            | +                    | -                | -                | +                      | +                | -                | (2)                 |
| EN079                    | L_EN1304            | -                    | +                | -                | +                      | +                | -                | (2)                 |
| EN080                    | L_EN1305            | +                    | -                | -                | +                      | +                | -                | (2)                 |
| EN086                    | L_EN1307            | +                    | +                | -                | +                      | +                | -                | (2)                 |
| EN088                    | L_EN1308            | +                    | -                | -                | +                      | +                | -                | (2)                 |
| EN092                    | L_EN1310            | +                    | -                | -                | +                      | +                | -                | (2)                 |
| EN095                    | L_EN1312            | +                    | +                | -                | +                      | +                | -                | (2)                 |
| EN096                    | L_EN1313            | +                    | +                | -                | +                      | +                | -                | (2)                 |
| EN100                    | L_EN1314            | +                    | +                | -                | +                      | +                | -                | (2)                 |
| EN103                    | L_En1315            | -                    | -                | -                | +                      | +                | -                | (2)                 |
| EN109                    | L_EN1319            | -                    | -                | -                | +                      | +                | -                | (2)                 |
| EN116                    | L_EN1325            | -                    | -                | -                | +                      | +                | -                | (2)                 |
| EN117                    | L_EN1326            | -                    | -                | -                | -                      | +                | -                | (2)                 |
| EN118                    | L_EN1327            | -                    | +                | -                | +                      | +                | -                | (2)                 |
| EN119                    | L_EN1328            | +                    | -                | -                | +                      | +                | -                | (2)                 |
| EN120                    | L_EN1329            | -                    | -                | -                | +                      | +                | -                | (2)                 |
| EN123                    | L_EN1330            | -                    | -                | -                | +                      | +                | -                | (2)                 |
| EN124                    | L_EN1331            | +                    | -                | -                | +                      | +                | -                | (2)                 |
| EN125                    | L_EN1332            | +                    | +                | -                | +                      | +                | -                | (2)                 |
| EN126                    | L_EN1333            | +                    | -                | -                | +                      | +                | -                | (2)                 |
| EN127                    | L_EN1334            | +                    | -                | -                | +                      | +                | -                | (2)                 |
| EN129                    | L_EN1335            | -                    | -                | -                | +                      | +                | -                | (2)                 |
| EN130                    | L_EN1336            | +                    | -                | -                | +                      | +                | -                | (2)                 |
| EN131                    | L_EN1337            | +                    | -                | -                | +                      | +                | -                | (2)                 |
| EN132                    | L_EN1338            | +                    | -                | -                | +                      | +                | -                | (2)                 |
| EN133                    | L_EN1339            | +                    | -                | -                | +                      | +                | -                | (2)                 |

|       |          |   |   |   |   |   |   |     |
|-------|----------|---|---|---|---|---|---|-----|
| EN134 | L_EN1340 | - | + | - | + | + | - | (2) |
| EN135 | L_EN1341 | - | - | - | + | + | - | (2) |
| EN137 | L_EN1343 | + | + | - | + | + | - | (2) |
| EN141 | L_EN1344 | + | - | - | + | + | - | (2) |
| EN143 | L_EN1346 | - | - | - | + | + | - | (2) |
| EN144 | L_EN1347 | + | - | - | + | + | - | (2) |
| EN145 | L_EN1348 | + | + | - | + | + | + | (2) |
| EN146 | L_EN1349 | + | - | - | + | + | - | (2) |
| EN147 | L_EN1350 | - | - | - | + | + | - | (2) |
| EN148 | L_EN1351 | - | - | - | + | + | - | (2) |
| EN149 | L_EN1352 | + | - | - | + | + | - | (2) |
| EN150 | L_EN1353 | - | - | - | + | + | - | (2) |
| EN153 | L_EN1355 | - | - | - | + | + | - | (2) |
| EN155 | L_EN1357 | + | - | - | + | + | - | (2) |
| EN156 | L_EN1358 | - | - | - | + | + | - | (2) |
| EN159 | L_EN1360 | + | + | - | + | + | - | (2) |
| EN160 | L_EN1361 | + | - | - | + | + | - | (2) |
| EN162 | L_EN1363 | + | + | - | + | + | - | (2) |
| EN164 | L_EN1365 | - | - | - | + | + | - | (2) |
| EN165 | L_EN1366 | + | - | - | + | + | - | (2) |
| EN166 | L_EN1367 | + | - | - | + | + | - | (2) |
| EN167 | L_EN1368 | + | - | - | + | + | - | (2) |
| EN168 | L_EN1369 | + | + | - | + | + | - | (2) |
| EN169 | L_EN1370 | - | - | - | + | + | - | (2) |
| EN171 | L_EN1371 | + | + | - | + | + | - | (2) |
| EN173 | L_EN1372 | - | - | - | + | + | - | (2) |
| EN174 | L_EN1374 | - | - | - | + | + | - | (2) |
| EN178 | L_EN1377 | + | - | - | + | + | - | (2) |
| EN181 | L_EN1379 | - | - | - | - | + | - | (2) |
| EN182 | L_En1380 | - | - | - | + | + | - | (2) |
| EN183 | L_EN1381 | - | - | - | + | + | - | (2) |
| EN184 | L_EN1382 | + | - | - | + | + | - | (2) |
| EN185 | L_EN1383 | - | - | - | + | + | - | (2) |
| EN188 | L_EN1385 | - | - | - | + | + | - | (2) |
| EN189 | L_EN1386 | + | + | - | + | + | - | (2) |
| EN191 | L_EN1388 | - | - | - | + | + | - | (2) |

129 <sup>a</sup> Prefix of "L\_" was used to distinguish the strain number in the library from the clinical isolate number, which is  
 130 maintained to be consistent with prior publications.

131 <sup>b</sup> CIP<sup>R</sup> = ciprofloxacin resistance. AZI<sup>R</sup> = azithromycin resistance. DOX<sup>R</sup> = doxycycline resistance.

132 <sup>c</sup> Sources of strains: (1) Mekalanos, J. J. Duplication and amplification of toxin genes in *Vibrio cholerae*. Cell 35,  
133 253-263, (1983) ; (2) Nelson, E. J. et al. Complexity of rice-water stool from patients with *Vibrio cholerae* plays a  
134 role in the transmission of infectious diarrhea. Proc Natl Acad Sci U S A 104, 19091-19096, (2007).

135 **Supplementary Table 2. Baseline growth parameters of *V. cholerae* clinical isolates**  
136 **under aerobic and anaerobic conditions**

137

| Growth parameter <sup>a</sup> | Aerobic median | Anaerobic median | P <sup>b</sup>    |
|-------------------------------|----------------|------------------|-------------------|
| K                             | 1.08           | 0.261            | <b>&lt; 0.001</b> |
| AUC                           | 5.15           | 1.58             | <b>&lt; 0.001</b> |
| Velocity                      | 0.011          | 0.006            | <b>&lt; 0.001</b> |

138 <sup>a</sup> AUC = area under the curve. K = carrying capacity. Media was LB alone without antibiotics. Velocity =  
139 growth rate in percent increase per minute at half the carrying capacity.

140 <sup>b</sup> Wilcoxon signed-rank test for growth. Bold = statistically significant (P<0.05).

141

142 **Supplementary Table 3.** Minimal inhibitory concentrations (MICs) for  
 143 ciprofloxacin, azithromycin, and doxycycline among *V. cholerae* clinical  
 144 isolates  
 145

| $\mu\text{g/ml}^{\text{a}}$ | Ciprofloxacin <sup>b</sup> |           | Azithromycin <sup>b</sup> |           | Doxycycline <sup>b</sup> |           |
|-----------------------------|----------------------------|-----------|---------------------------|-----------|--------------------------|-----------|
|                             | Aerobic                    | Anaerobic | Aerobic                   | Anaerobic | Aerobic                  | Anaerobic |
| 0.002                       | 0                          | 0         | 0                         | 0         | 0                        | 0         |
| 0.004                       | 1                          | 0         | 0                         | 0         | 0                        | 0         |
| 0.008                       | 0                          | 0         | 0                         | 0         | 0                        | 0         |
| 0.016                       | 2                          | 1         | 0                         | 0         | 0                        | 0         |
| 0.032                       | 0                          | 0         | 0                         | 0         | 0                        | 0         |
| 0.063                       | 0                          | 1         | 0                         | 0         | 0                        | 0         |
| 0.13                        | 0                          | 1         | 0                         | 0         | 2                        | 1         |
| 0.25                        | 0                          | 0         | 0                         | 0         | 7                        | 4         |
| 0.5                         | 5                          | 0         | 0                         | 0         | 14                       | 9         |
| 1                           | 23                         | 2         | 5                         | 0         | <b>38</b>                | <b>26</b> |
| 2                           | <b>35</b>                  | 4         | 22                        | 0         | 2                        | 21        |
| 4                           | 0                          | 1         | <b>23</b>                 | 0         | 3                        | 4         |
| 8                           | 1                          | <b>56</b> | 15                        | 3         | 1                        | 1         |
| 16                          | 0                          | 0         | 0                         | 4         | 0                        | 1         |
| 32                          | 0                          | 1         | 2                         | <b>44</b> | 0                        | 0         |
| 64                          | 0                          | 0         | 0                         | 14        | 0                        | 0         |
| 124                         | 0                          | 0         | 0                         | 2         | 0                        | 0         |

146 <sup>a</sup> Concentration of antibiotic.

147 <sup>b</sup> Distribution of MICs for clinical isolates grown under aerobic and anaerobic conditions. Bold text  
 148 signifies the concentration at which the MIC mode was determined among the clinical isolates.

149



150 **Supplementary Table 4.** Comparison of rates of resistance detected under aerobic  
151 versus anaerobic conditions among *V. cholerae* clinical isolates in the primary collection  
152

|                            | N  | R <sup>Ae</sup> /R <sup>An</sup> | R <sup>Ae</sup> /S <sup>An</sup> | S <sup>Ae</sup> /R <sup>An</sup> | S <sup>Ae</sup> /S <sup>An</sup> | p <sup>b</sup>   |
|----------------------------|----|----------------------------------|----------------------------------|----------------------------------|----------------------------------|------------------|
| Ciprofloxacin <sup>a</sup> | 67 | 36                               | 0                                | 26                               | 5                                | <b>&lt;0.001</b> |
| Azithromycin <sup>a</sup>  | 67 | 15                               | 0                                | 52                               | 0                                | <b>&lt;0.001</b> |
| Doxycycline <sup>a</sup>   | 67 | 0                                | 1                                | 1                                | 65                               | 1                |

153 <sup>a</sup> Distribution of paired resistant ('R') and sensitive ('S') phenotypes for isolates under aerobic ('Ae') and  
154 anaerobic ('An') conditions.

155 <sup>b</sup> McNemar's Exact Test. Bold = statistically significant (P<0.05)

156

157 **Supplementary Table 5.** Comparison of rates of resistance detected under aerobic  
158 versus anaerobic conditions among *V. cholerae* clinical isolates in the secondary  
159 collection  
160

|                            | N   | R <sup>Ae</sup> /R <sup>An</sup> | R <sup>Ae</sup> /S <sup>An</sup> | S <sup>Ae</sup> /R <sup>An</sup> | S <sup>Ae</sup> /S <sup>An</sup> | p <sup>b</sup>   |
|----------------------------|-----|----------------------------------|----------------------------------|----------------------------------|----------------------------------|------------------|
| Ciprofloxacin <sup>a</sup> | 120 | 1                                | 1                                | 46                               | 72                               | <b>&lt;0.001</b> |
| Azithromycin <sup>a</sup>  | 120 | 56                               | 0                                | 64                               | 0                                | <b>&lt;0.001</b> |
| Doxycycline <sup>a</sup>   | 120 | 0                                | 0                                | 2                                | 118                              | 0.480            |

161 <sup>a</sup> Distribution of paired resistant ('R') and sensitive ('S') phenotypes for isolates under aerobic ('Ae') and  
162 anaerobic ('An') conditions.

163 <sup>b</sup> McNemar's Exact Test. Bold = statistically significant (P<0.05)

164

165

166 **Supplementary Table 6.** Effect of catalase on growth parameters for *V. cholerae*  
 167 E7946 and EN160 under aerobic conditions  
 168

| Experiment | Strain <sup>a</sup> | Antibiotic <sup>b</sup> | Catalase <sup>c</sup> | AUC mean <sup>d</sup> | AUC IQR <sup>d</sup> | P <sup>e</sup> |
|------------|---------------------|-------------------------|-----------------------|-----------------------|----------------------|----------------|
| 1.         | E7946               | CIP                     | YES                   | 41.84                 | 1.76                 | 0.136          |
|            |                     | CIP                     | NO                    | 44.2                  | 0.865                |                |
| 2.         | E7946               | AZI                     | YES                   | 196                   | 3.37                 | 0.533          |
|            |                     | AZI                     | NO                    | 197.5                 | 0.294                |                |
| 3.         | E7946               | DOX                     | YES                   | 308.5                 | 6.32                 | 0.959          |
|            |                     | DOX                     | NO                    | 308.9                 | 4.11                 |                |
| 4.         | E7946               | NO                      | YES                   | 317.3                 | 4.65                 | 0.818          |
|            |                     | NO                      | NO                    | 318                   | 5.42                 |                |
| 5.         | EN160               | CIP                     | YES                   | 138.4                 | 22.1                 | 0.551          |
|            |                     | CIP                     | NO                    | 126.1                 | 25.2                 |                |
| 6.         | EN160               | AZI                     | YES                   | 265.8                 | 7.12                 | 0.571          |
|            |                     | AZI                     | NO                    | 269.9                 | 6.75                 |                |
| 7.         | EN160               | DOX                     | YES                   | 280.1                 | 19.3                 | 0.895          |
|            |                     | DOX                     | NO                    | 275.8                 | 21.6                 |                |
| 8          | EN160               | NO                      | YES                   | 319.5                 | 11.26                | 0.092          |
|            |                     | NO                      | NO                    | 326.6                 | 8.78                 |                |

169 <sup>a</sup> E7946 (Cip<sup>S</sup>, Azi<sup>S</sup>, Dox<sup>S</sup>) is the reference strain and EN160 (Cip<sup>R</sup>, Azi<sup>R</sup>, Dox<sup>S</sup>) is a clinical isolate.  
 170 Biological replicates in experiments 1-3 and 5-7 were 3, each with 4 technical replicates. Biological  
 171 replicates for experiments 4 and 8 were 9, each with 4 technical replicates.

172 <sup>b</sup> CIP = ciprofloxacin. AZI = azithromycin. DOX = doxycycline. Assays were run at CIP = 0.5, AZI = 2, and  
 173 DOX = 0.25 µg/ml for EN160; E7946 was run at CIP = 0.002, AZI = 1, and DOX = 0.013  
 174 µg/ml.

175 <sup>c</sup> CIP and AZI were tested with 3 biological replicates; DOX with 2 biological replications; LB controls with  
 176 9 biological replicates.

177 <sup>d</sup> AUC = area under the curve. IQR = interquartile range.

178 <sup>e</sup> Student's t-test. Bold = statistically significant (P<0.05)

179 **Supplementary Table 7.** Comparison of antibiotic resistance phenotypes and known  
 180 resistance genotypes among *V. cholerae* clinical isolates

| Aerobic conditions <sup>a</sup>   |                |     |      |     |      |                 |                     |                  |
|-----------------------------------|----------------|-----|------|-----|------|-----------------|---------------------|------------------|
| Antibiotic tested                 | Gene           | R/P | R/NP | S/P | S/NP | OR <sup>b</sup> | 95% CI <sup>b</sup> | P <sup>b</sup>   |
| Ciprofloxacin                     | <i>qnrVc</i>   | 36  | 0    | 16  | 15   | 31              | (4.22 - 695)        | <b>&lt;0.001</b> |
|                                   | <i>gyrA</i>    | 28  | 8    | 12  | 19   | 5.4             | (1.86 - 17.9)       | <b>0.002</b>     |
|                                   | <i>parC</i>    | 31  | 5    | 16  | 15   | 5.6             | (1.65 - 18.9)       | <b>0.003</b>     |
| Azithromycin                      | <i>mphA</i>    | 15  | 0    | 7   | 45   | 83              | (11.2 - 1938)       | <b>&lt;0.001</b> |
| Doxycycline                       | <i>tet(59)</i> | 1   | 0    | 51  | 15   | 0.62            | (0.046 - 18.9)      | 0.566            |
| Anaerobic conditions <sup>a</sup> |                |     |      |     |      |                 |                     |                  |
| Antibiotic tested                 | Gene           | R/P | R/NP | S/P | S/NP | OR <sup>b</sup> | 95% Cb <sup>c</sup> | P <sup>b</sup>   |
| Ciprofloxacin                     | <i>qnrVc</i>   | 52  | 10   | 0   | 5    | 27              | (3.53 - 666)        | <b>&lt;0.001</b> |
|                                   | <i>gyrA</i>    | 40  | 22   | 0   | 5    | 10              | (1.39 - 248)        | <b>0.016</b>     |
|                                   | <i>parC</i>    | 47  | 15   | 0   | 5    | 17              | (2.28 - 416)        | <b>0.003</b>     |
| Azithromycin                      | <i>mphA</i>    | 22  | 45   | 0   | 0    | 0.51            | (0.0127 - 20.1)     | 1                |
| Doxycycline                       | <i>tet(59)</i> | 1   | 0    | 51  | 15   | 0.62            | (0.046 - 18.9)      | 0.566            |

181 <sup>a</sup> R = resistant phenotype, S = sensitive phenotype, P = gene present, NP = gene not present.  
 182 Enumerations include isolates with at least the specific gene named; isolates may have more than one  
 183 resistance gene (e.g. *qnrVC*, *gyrA* and *parC*)  
 184 <sup>b</sup> Fisher's Exact Test. Bold = statistically significant (P<0.05)  
 185  
 186

187 **Supplementary Table 8.** Test of association between antibiotic detection by  
 188 mass spectrometry and AMR genotypes and phenotypes among *V. cholerae*  
 189 clinical isolates

| Antibiotic detection (D) and AMR genotype present (P) <sup>a</sup>                            |     |      |      |       |                |
|-----------------------------------------------------------------------------------------------|-----|------|------|-------|----------------|
|                                                                                               | D/P | D/NP | ND/P | ND/NP | P <sup>b</sup> |
| CIP                                                                                           | 41  | 7    | 3    | 0     | 1              |
| CIP + NAL                                                                                     | 35  | 4    | 9    | 3     | 0.334          |
| DOX                                                                                           | 16  | 8    | 20   | 7     | 0.759          |
| DOX + TET                                                                                     | 2   | 0    | 34   | 15    | 1              |
| Antibiotic detection (D) and resistance phenotype (R) under aerobic conditions <sup>a</sup>   |     |      |      |       |                |
|                                                                                               | D/R | D/S  | ND/R | ND/S  | P <sup>b</sup> |
| CIP                                                                                           | 24  | 24   | 3    | 0     | 0.238          |
| CIP + NAL                                                                                     | 22  | 17   | 5    | 7     | 0.511          |
| DOX                                                                                           | 1   | 23   | 0    | 27    | 0.471          |
| DOX + TET                                                                                     | 0   | 2    | 1    | 48    | 1              |
| Antibiotic detection (D) and resistance phenotype (R) under anaerobic conditions <sup>a</sup> |     |      |      |       |                |
|                                                                                               | D/R | D/S  | ND/R | ND/S  | P <sup>b</sup> |
| CIP                                                                                           | 44  | 4    | 3    | 0     | 1              |
| CIP + NAL                                                                                     | 38  | 1    | 9    | 3     | <b>0.036</b>   |
| DOX                                                                                           | 1   | 23   | 0    | 27    | 0.217          |
| DOX + TET                                                                                     | 0   | 2    | 1    | 48    | 1              |

190 <sup>a</sup> D=detected, ND=not detected, R=resistant by MIC, S=sensitive by MIC, P = Present, NP  
 191 = Not present.

192 <sup>b</sup> Fisher's Exact Test. Bold = statistically significant (P<0.05)

193  
 194

195 **Supplementary References**

- 196 1. Drezen E, Rizk G, Chikhi R, et al. GATB: Genome Assembly & Analysis Tool Box.  
197 *Bioinformatics* **2014**; 30:2959-61.
- 198 2. Lees JA, Galardini M, Bentley SD, Weiser JN, Corander J. pyseer: a comprehensive  
199 tool for microbial pangenome-wide association studies. *Bioinformatics* **2018**; 34:4310-2.
- 200 3. Cook DE, Andersen EC. VCF-kit: assorted utilities for the variant call format.  
201 *Bioinformatics* **2017**; 33:1581-2.
- 202 4. Stamatakis A. RAxML version 8: a tool for phylogenetic analysis and post-analysis of  
203 large phylogenies. *Bioinformatics* **2014**; 30:1312-3.
- 204 5. Saber MM, Shapiro BJ. Benchmarking bacterial genome-wide association study  
205 methods using simulated genomes and phenotypes. *Microb Genom* **2020**; 6.
- 206 6. Davydova N, Streltsov V, Wilce M, Liljas A, Garber M. L22 ribosomal protein and  
207 effect of its mutation on ribosome resistance to erythromycin. *J Mol Biol* **2002**; 322:635-  
208 44.
- 209 7. Hansen LH, Mauvais P, Douthwaite S. The macrolide-ketolide antibiotic binding site  
210 is formed by structures in domains II and V of 23S ribosomal RNA. *Mol Microbiol* **1999**;  
211 31:623-31.
- 212 8. Williams G, Smith I. Chromosomal mutations causing resistance to tetracycline in  
213 *Bacillus subtilis*. *Mol Gen Genet* **1979**; 177:23-9.
- 214 9. Wei Y, Bechhofer DH. Tetracycline induces stabilization of mRNA in *Bacillus subtilis*.  
215 *J Bacteriol* **2002**; 184:889-94.
- 216 10. Beabout K, Hammerstrom TG, Perez AM, et al. The ribosomal S10 protein is a  
217 general target for decreased tigecycline susceptibility. *Antimicrob Agents Chemother*  
218 **2015**; 59:5561-6.

- 219 11. Leclercq SO, Wang C, Zhu Y, et al. Diversity of the Tetracycline Mobilome within a  
220 Chinese Pig Manure Sample. *Appl Environ Microbiol* **2016**; 82:6454-62.
- 221 12. Grossman TH, Starosta AL, Fyfe C, et al. Target- and resistance-based mechanistic  
222 studies with TP-434, a novel fluorocycline antibiotic. *Antimicrob Agents Chemother*  
223 **2012**; 56:2559-64.
- 224 13. Noguchi N, Emura A, Matsuyama H, O'Hara K, Sasatsu M, Kono M. Nucleotide  
225 sequence and characterization of erythromycin resistance determinant that encodes  
226 macrolide 2'-phosphotransferase I in *Escherichia coli*. *Antimicrob Agents Chemother*  
227 **1995**; 39:2359-63.
- 228 14. Chesneau O, Tsvetkova K, Courvalin P. Resistance phenotypes conferred by  
229 macrolide phosphotransferases. *FEMS Microbiol Lett* **2007**; 269:317-22.
- 230
