# **Genome-wide association studies reveal distinct genetic correlates and increased heritability of antimicrobial resistance in *Vibrio cholerae* under anaerobic conditions**

A. Creasy-Marrazzo<sup>1†</sup>, M.M. Saber<sup>2†</sup>, M. Kamat<sup>3</sup>, L. S. Bailey<sup>3</sup>, L. Brinkley<sup>1</sup>, E. T. Cato<sup>1</sup>,  
Y. Begum<sup>4</sup>, M.M. Rashid<sup>4</sup>, A. I. Khan<sup>4</sup>, F. Qadri<sup>4</sup>, K. B. Basso<sup>3</sup>, B. J. Shapiro<sup>2\*</sup>, E. J.  
Nelson<sup>1\*</sup>

<sup>1</sup> Departments of Pediatrics and Environmental and Global Health, University of Florida, Gainesville, FL, USA,

<sup>2</sup> Department of Microbiology & Immunology, McGill University

<sup>3</sup> Departments of Chemistry, University of Florida, Gainesville, FL, USA,

<sup>4</sup> Infectious Diseases Division (IDD) & Nutrition and Clinical Services Division (NCSD), International Centre for Diarrhoeal Disease Research, Bangladesh (icddr,b), Dhaka, Bangladesh

† Co-first authors

\* Corresponding authors

Email: [eric.nelson@ufl.edu](mailto:eric.nelson@ufl.edu); [jesse.shapiro@mcgill.ca](mailto:jesse.shapiro@mcgill.ca)

Keywords: Antimicrobial resistance, AMR, antibiotics, cholera, diarrhoea, diarrhea,

*Vibrio cholerae*, enteropathogens, Bangladesh, anaerobic, anoxic, hypoxic, respiration

## 1 **Abstract**

2 The antibiotic formulary is threatened by high rates of antimicrobial resistance (AMR)  
3 among enteropathogens. Enteric bacteria are exposed to anaerobic conditions within  
4 the gastrointestinal tract, yet little is known about how oxygen exposure influences  
5 AMR. The facultative anaerobe *Vibrio cholerae* was chosen as a model to address this  
6 knowledge gap. We obtained *V. cholerae* isolates from 66 cholera patients, sequenced  
7 their genomes, and grew them under anaerobic and aerobic conditions with and without  
8 three clinically relevant antibiotics (ciprofloxacin, azithromycin, doxycycline). For  
9 ciprofloxacin and azithromycin, the minimal inhibitory concentration (MIC) increased  
10 under anaerobic conditions compared to aerobic conditions. Using standard resistance  
11 breakpoints, the odds of classifying isolates as resistant increased over 10 times for  
12 ciprofloxacin and 100 times for azithromycin under anaerobic conditions compared to  
13 aerobic conditions. For doxycycline, nearly all isolates were sensitive under both  
14 conditions. Using genome-wide association studies (GWAS), we found associations  
15 between genetic elements and AMR phenotypes that varied by oxygen exposure and  
16 antibiotic concentrations. These AMR phenotypes were more heritable, and the AMR-  
17 associated genetic elements were more often discovered, under anaerobic conditions.  
18 These AMR-associated genetic elements are promising targets for future mechanistic  
19 research. Our findings provide a rationale to determine if increased MICs under  
20 anaerobic conditions are associated with therapeutic failures and/or microbial escape in  
21 cholera patients. If so, there may be a need to determine new AMR breakpoints for  
22 anaerobic conditions.

## 23 **Impact statement**

24 Many bacterial pathogens experience anaerobic conditions in the gut, but antimicrobial  
25 resistance (AMR) phenotypes are generally tested under ambient aerobic conditions in  
26 the laboratory. To better understand AMR under conditions more similar to natural  
27 infections, we used *Vibrio cholerae* as a model enteric pathogen. We sequenced the  
28 genomes and assessed the growth of *V. cholerae* isolates with different concentrations  
29 of three antibiotics, under anaerobic and aerobic conditions. In support of the  
30 hypothesis that AMR varies according to oxygen exposure, *V. cholerae* was more  
31 resistant to antibiotics under anaerobic conditions. We found many previously known  
32 genes associated with resistance; however, some of these genes were only resistance-  
33 associated under aerobic conditions. Resistance to azithromycin and doxycycline only  
34 had a detectable genetic component under anaerobic conditions. Together, our results  
35 point to distinct genetic mechanisms of resistance under anaerobic conditions and  
36 suggest several candidate genes for experimental follow-up.

## 37 **Data summary**

38 All sequencing data generated in this study are available in NCBI under BioProject  
39 PRJNA818081.

40

## 41 INTRODUCTION

42 Clinically relevant laboratory methods are essential to gauge the extent to which the  
43 antibiotic formulary is threatened by antimicrobial resistance (AMR). Knowledge gaps  
44 remain on the degree to which *in vitro* AMR assays reflect *in vivo* AMR physiology.  
45 Facultative anaerobic pathogens experience hypoxia and anoxia within the  
46 gastrointestinal tract, yet AMR assays rely on aerobic conditions [1]. How oxygen  
47 exposure effects AMR is poorly understood. To investigate this question, we chose the  
48 facultative anaerobe *Vibrio cholerae* as a model system. In *V. cholerae*, classic  
49 mechanisms for AMR, and physiologic pathways for anaerobic respiration and  
50 fermentation, are well characterized [2-9]. The disease cholera is also one of the few  
51 non-invasive diarrheal diseases for which antibiotics are indicated, albeit conditionally  
52 [10-12].

53 Rehydration is the definitive intervention for acute diarrheal disease [11]; antibiotics are  
54 supportive and indicated for only a few diarrheal diseases, including cholera. The World  
55 Health Organization (WHO) recommends ciprofloxacin, azithromycin or doxycycline for  
56 cholera patients with severe dehydration [10-12]; antibiotics shorten the frequency and  
57 duration of diarrhea. In practice, guideline adherence in cholera endemic regions may  
58 be low out of clinical concern that a patient 'might' have cholera and may develop  
59 severe dehydration, contributing to rates of inappropriate antibiotic usage that can rise  
60 above 90% [13, 14]. Strong regional associations between antibiotic use and rise of  
61 AMR have been observed across enteric taxa [15, 16]. Given that AMR genes  
62 frequently co-localize on mobile elements [17], inappropriate single-agent therapy poses  
63 a risk of multidrug-resistance (MDR) selection.

64 Associations between AMR phenotypes and genotypes are known for the three  
65 antibiotics recommended to treat cholera; the cognate AMR mechanisms share  
66 commonality across Gram negative taxa. Ciprofloxacin (a fluoroquinolone) resistance  
67 mechanisms include mutations in genes encoding type II topoisomerases:  
68 heterotetrameric DNA gyrase (GyrA<sub>2</sub>GyrB<sub>2</sub>) and DNA topoisomerase IV (ParC<sub>2</sub>ParE<sub>2</sub>).  
69 Mutations in the quinolone resistance-determining region (QRDR) of *gyrA* and *parC* can  
70 yield additive resistance phenotypes [18]. Fluoroquinolone resistance can also arise by  
71 efflux pump upregulation, by downregulation of outer membrane porins that permit  
72 quinolone entry, and by the expression of the quinolone resistance protein (Qnr, a  
73 pentapeptide repeat protein) that protects the target gyrase protein [18]. Resistance can  
74 increase over 30-fold compared to wild-type when strains harbor *qnr* family genes.

75 In *V. cholerae*, diverse AMR genes, including *qnr*, often reside on an integrative and  
76 conjugative element (ICE; 'SXT' in *V. cholerae*) [17, 19, 20]. Azithromycin (a macrolide)  
77 resistance mechanisms are similarly diverse and include mutations in the 23S ribosomal  
78 RNA (rRNA) target genes and ribosomal protein genes. Macrolide resistance is  
79 conveyed by carriage of rRNA methyltransferase genes (*erm*) and associated induction  
80 mechanisms, *cis*-acting peptides, efflux systems (e.g. *mef*, *msr*), macrolide esterases  
81 (e.g. *ere*), and macrolide phosphotransferases such as *mphA* which can reside on the  
82 *V. cholerae* SXT element [21]. Doxycycline (a tetracycline) resistance is conferred by  
83 mutations in the 16S rRNA component of the 30S ribosomal subunit [22]. Additional  
84 mechanisms include tetracycline-specific ribosomal protection proteins (RPPs),  
85 tetracycline specific efflux pumps (e.g. *tet*(59)) which can reside on SXT element

86 intrinsic efflux pumps, AraC-family transcriptional activators (e.g. MarA), and  
87 cytoplasmic ATP-dependent serine proteases [22].

88 Associations between AMR phenotypes and genotypes have been studied by random  
89 mutagenesis, phenotypic screening, and network analyses [23-28], and applied in *V.*  
90 *cholerae* [29]. These approaches uncover how the effect of an antibiotic is shaped by a  
91 large number of often more subtle physiologic perturbations, including altered DNA  
92 synthesis/repair, central metabolism/growth, and SOS response [30, 31]. AMR assays  
93 conducted under aerobic conditions alone may not reflect these physiologic  
94 perturbations experienced in the host. Within bacteria, aerobic oxidative  
95 phosphorylation generates reactive oxygen species (ROS) that are lethal unless a  
96 sufficient defense is mounted by factors like superoxide dismutase, catalase, and  
97 glutathione systems [32, 33]. Under anaerobic conditions, growth rate typically slows  
98 and proton motive force is reduced [34, 35], which can have both synergistic and  
99 antagonistic effects on antibiotics [31, 36]. In *Escherichia coli*, ROS are generated after  
100 fluoroquinolone treatment under aerobic conditions [37] and fluoroquinolone resistance  
101 increases under anaerobic conditions [38, 39]. The extent to which tetracyclines and  
102 macrolides induce ROS and how anaerobiosis influences resistance and susceptibility  
103 is less known [30, 40].

104 The objective of this study was to compare AMR phenotypes, with underlying  
105 genotypes, under aerobic and anaerobic conditions among isolates obtained from  
106 cholera patients. The study rationale assumes that the lower gastrointestinal tract of  
107 cholera patients is hypoxic/anaerobic, despite animal experiments that suggest aerobic  
108 respiration in the upper gastrointestinal tract is important for infection [41, 42]. Using

109 minimal inhibitory concentration assays (MICs), we found that AMR increased under  
110 anaerobic conditions for select antibiotics, and novel genetic targets for AMR were  
111 discovered under anaerobic conditions.

## 112 **METHODS**

113 **Clinical sample collection.** The two sample collections analyzed were part of  
114 previously published IRB approved studies [13, 43]. In the primary collection, stool  
115 samples were obtained during the spring cholera outbreak period of 2006 at the  
116 International Centre for Diarrhoeal Disease Research, Bangladesh (icddr,b) in Dhaka,  
117 Bangladesh. Samples were collected prior to hospital administration of antibiotics;  
118 patient histories were negative for known antibiotic exposure. The library consisted of  
119 67 *V. cholerae* isolates (Supplementary Table 1); paired stool supernatant for mass  
120 spectrometry was available for 50 isolates. In the secondary collection, samples were  
121 obtained in 2018 as part of a cholera surveillance study conducted across Bangladesh  
122 [13]. Samples were collected at hospital admission independent of reported antibiotic  
123 exposure; 277 out of 282 isolates cultured and were analyzed to assess generalizability  
124 of the AMR profiles identified in the primary collection.

125 **Antimicrobial resistance testing.** Growth kinetics and the MIC determinations for  
126 ciprofloxacin, azithromycin, and doxycycline were performed on isolates from the  
127 primary collection in LB broth with twelve two-fold serial dilutions with concentrations  
128 spanning the CLSI MIC breakpoints [1] for *V. cholerae* (ciprofloxacin = 2 µg/ml;  
129 azithromycin = 8 µg/ml; doxycycline = 8 µg/ml) [1]. Isolates were prepared and grown  
130 aerobically at 37°C in 15-ml tubes containing 5-ml LB broth at 220 rpm. Bacteria were  
131 back-diluted to a final optical density (OD) 600 nm of 0.01 (200 µl/well) in LB with or

132 without the respective antibiotic dilution-series in black Corning CoStar clear-bottom 96-  
133 well plates. Plates were placed in a BioTek Synergy H1 reader pre-warmed to 37°C with  
134 the lid on. Anaerobic conditions were generated using a continuous chamber flow (5%  
135 CO<sub>2</sub>, 95% N<sub>2</sub>) and a BioTek CO<sub>2</sub>/O<sub>2</sub> gas controller; anaerobic growth plates were given  
136 a 10-minute equilibration period. OD 600 nm was measured every 2 minutes for 8 hours  
137 at 37°C with orbital shaking at 220 rpm. A standard logistic equation was fit to growth  
138 curve data using the R package *growthcurver* version 0.3.0 [44]. Outcome measures  
139 were intrinsic growth velocity (growth rate that would occur if there were no restrictions  
140 on total population size), carrying capacity (K; maximum possible population size), and  
141 area under the curve (AUC). The MIC was determined using a logistic fit for growth over  
142 the twelve, two-fold serial dilutions of the test antibiotic. Binary phenotypic  
143 sensitive/resistance categories were set in concordance with Clinical and Laboratory  
144 Standards Institute (CLSI; M45 2018 3<sup>rd</sup> edition) [45]. In general, CLSI breakpoints are  
145 set by clinical and bacteriological response data, pharmacokinetic and  
146 pharmacodynamic simulations, and expert working group experience. The breakpoints  
147 for *V. cholerae* are based on aerobic assays. Susceptible (sensitive) is defined by CLSI  
148 as the “category that implies that isolates are inhibited by the usually achievable  
149 concentrations of antimicrobial agent when the dosage recommended to treat the site of  
150 infection is used”. Those not sensitive were scored as resistant (combines  
151 indeterminate and resistant). Three isolates and one reference strain (E7946) were  
152 used to assess media acidification during anaerobic and aerobic growth; the pH was  
153 measured using dipsticks (pH range 5.2-7.2). The assays were conducted with and



154 without the addition of 20mM fumarate as an alternative electron acceptor for anaerobic  
155 respiration.

156 **Use of catalase to determine if ROS contribute to antibiotic sensitivity.** To test if  
157 the reduction of ROS was associated with increased resistance to antibiotics under  
158 aerobic conditions, MICs were determined for two select strains (E7946, EN160) with  
159 and without catalase (10 U/ml; final concentration) added to the media. Growth curves  
160 were performed with viable counts as endpoints to determine the minimum dose for  
161 lethality by H<sub>2</sub>O<sub>2</sub> or protection by catalase.

162 **Whole-genome sequencing.** Genomic DNA was extracted from *V. cholerae* isolates  
163 from the primary collection using the Qiagen DNeasy Blood and Tissue Kit. Library  
164 construction was completed using the Illumina Nextera XT v.2 DNA Library Preparation  
165 Kit. Libraries were sequenced in three illumina MiSeq runs. Two batches of twenty-four  
166 genomes and one batch of nineteen were pooled and sequenced on a MiSeq for 500  
167 cycles per run. Using CLC Genomics Workbench v20, raw reads were filtered by length,  
168 trimmed, and mapped to the reference genome (*V. cholerae* O1 El Tor E7946) to  
169 identify single-nucleotide variants. Of the 67 isolates, 66 yielded sufficient coverage  
170 (>50X) of the *V. cholerae* genome. We proceeded with these 66 genomes for further  
171 analysis. To identify genes not present in the reference genome, contigs were  
172 assembled *de novo* using CLC Genomics Workbench v20.

173 **Genome-wide association studies (GWAS).** To extract genomic variants capturing all  
174 sources of variation in the genome (i.e. single nucleotide variants, indels and gene  
175 presence/absence) without *a priori* assumption about the underlying gene content of

176 each sample (e.g. accessory genes or plasmids), unitigs were generated from the 66  
177 genomes assembled using GATB [46]. Unitigs are sequences of variable length (unlike  
178 k-mers of fixed length  $k$ ) which represent the variations in the population of genomes  
179 under study in high-resolution. GWAS were performed using linear mixed models  
180 implemented in pyseer v.1.3.6 and adjusted for population stratification using the  
181 kinship matrix estimated from the phylogenetic tree[47].

182 To generate the phylogenetic tree, genome alignments consisting entirely of variable  
183 nucleotides were produced from whole genome SNP data generated by CLC Genomics  
184 Workbench v20 using VCF-kit 0.1.6 [48]. The tree was then inferred by RaxML under  
185 the general time reversible (GTR) model with rate variation across sites following a  
186 GAMMA distribution[49]. We used the linear-mixed model approach to adjust for  
187 population stratification and linkage disequilibrium in microbial GWAS [50]. Heritability  
188 ( $h^2$ ), an estimate of the proportion of the phenotype variance that can be explained by  
189 total genomic variation represented in the unitigs, was also calculated using pyseer  
190 v.1.3.6. Likelihood-ratio test  $p$ -values for the association tests were adjusted for  
191 multiple-testing by Bonferroni correction (at a genome-wide false discovery rate of 0.05)  
192 for the number of unique unitig patterns (i.e. only giving one count to a unitig with an  
193 identical presence/absence profile across genomes). We also removed unitigs tagged  
194 with the errors 'bad-chisq', 'pre-filtering-failed', 'lrt-filtering-failed', 'firth-fail' and 'matrix-  
195 inversionerror' after the analysis. To further remove false positive GWAS hits, we  
196 removed any considerable clusters of unitigs ( $> 20$ ) with identical  $p$ -values, as these are  
197 likely to be lineage-specific markers or markers with strong linkage disequilibrium  
198 comprised of mostly non-causal variants linked on the same clonal frame. GWAS hits

199 were annotated by mapping the unitigs to two reference genomes of *V. cholerae*,  
200 namely, E7946 (NCBI assembly accession number: GCA\_002749635.1) and O1  
201 biotype El Tor strain N16961 (NCBI assembly accession number: GCA\_003063785.1)  
202 using BWA. Statistically significant GWAS hits were further annotated with the CARD  
203 resistance gene identifier (RGI) after filtering the 'loose' hits and hits with identity <0.90.

#### 204 **Antibiotic detection by liquid chromatography mass spectrometry (LC-MS/MS).**

205 The approach was based on a prior study [51]. Stool supernatant from the primary  
206 collection were obtained by centrifugation and filtration (0.2  $\mu$ M surfactant-free cellulose  
207 acetate; Thermo Scientific Nalgene). Proteins were precipitated (1:7 ratio (v/v) of  
208 water:methanol). Supernatants were diluted with methanol and water (1:1 v/v) in 0.1%  
209 formic acid for liquid chromatography, and 5  $\mu$ l of supernatant was injected for analysis.  
210 LC/MSMS was performed on a 2.1 x 150-mm Hypersil Gold aQ column (particle size, 3  
211  $\mu$ m) using a high-performance liquid chromatography system (Thermo UltiMate 3000  
212 series) with an LTQ XL ion trap mass spectrometer (Thermo Fisher Scientific). Mobile  
213 phases were 1% formic acid in water (A) and 1% formic acid in methanol (B) and held at  
214 a constant 5%B for 2min before ramping to 95%B at 15 min where it was held for an  
215 additional minute before returning to starting conditions for a total run time of 25 min.

216 Eluent was ionized using electrospray ionization (ESI) in positive mode at a spray  
217 voltage of 5 kV, a nitrogen sheath gas flow rate of 8 L min<sup>-1</sup>, and capillary temperature  
218 of 300°C. Two scan events were programmed to perform an initial scan from *m/z* 100 to  
219 1000, which was followed by targeted collision induced dissociation based on a  
220 retention time and mass list. Retention time windows ranged from 0.35 minutes to 6.50  
221 min, depending on the elution range of the standards at high and low concentrations.

222 Masses were targeted for the most abundant adduct or ion associated with each  
223 antibiotic (typically the  $[M+H]^+$  ion) with a  $m/z$  1 window. Data analysis for amoxicillin,  
224 sulfamethoxazole/trimethoprim, azithromycin, tetracycline, doxycycline, metronidazole,  
225 nalidixic acid, and ciprofloxacin was performed manually using extracted ion  
226 chromatograms and MSMS matching with an in-house antibiotic MSMS library using  
227 Xcalibur 2.2 SP 1.48 (Thermo Fisher Scientific).

228 **Statistical analysis.** Bivariate analyses of categorical data were analyzed using  
229 Fisher's Exact Test, and continuous data were analyzed using the Mann-Whitney U  
230 Test ( $\alpha = 0.05$ ). McNemar's test was used to analyze paired data ( $\alpha = 0.05$ ).

## 231 **RESULTS**

### 232 **Comparison of antimicrobial resistance under aerobic and anaerobic conditions.**

233 We measured baseline growth parameters for each isolate under anaerobic and aerobic  
234 conditions and found that carrying capacity, area under the growth curve (AUC), and  
235 growth velocity were all significantly lower under anaerobic conditions (Supplementary  
236 Table 2). We tested an assumption that under anaerobic conditions mixed fermentation  
237 and anaerobic respiration would occur in LB media. Analyzing a subset of three isolates  
238 and the reference strain E7946, we monitored for acidification as a sign of fermentation  
239 and assessed the impact of the addition of an alternative electron acceptor (20 mM  
240 fumarate) for anaerobic respiration. Under anaerobic conditions, one out of four strains  
241 acidified the LB media to 6.0 (Supplementary Table 3), suggesting fermentation in at  
242 least some isolates. The addition of fumarate as an alternative electron acceptor under  
243 anaerobic conditions resulted in a small increase in AUC of 25-27% (Supplementary

244 Table 3), suggesting that in LB media anaerobic respiration likely occurs but is limited  
245 for alternative electron acceptors. These results are consistent with mixed fermentation  
246 and anaerobic respiration in our experimental conditions.

247 In this physiologic context and using standard antibiotic breakpoints established for  
248 aerobic conditions, AMR differed between anaerobic versus aerobic conditions (Fig. 1);  
249 distributions of single and multi-agent AMR phenotypes are shown (Fig. 2A). The MIC  
250 modes for ciprofloxacin were 8 µg/ml (min=0.016 µg/ml; max=32 µg/ml) and 2 µg/ml  
251 (min=0.004 µg/ml; max=8 µg/ml) under anaerobic and aerobic conditions, respectively  
252 (Supplementary Table 4); the rates of resistance under anaerobic (93%; N=62/67) and  
253 aerobic (54%; N=36/67) conditions were significantly different (Fig. 1A; McNemar's test  
254  $p < 0.001$ ; Supplementary Table 5). For azithromycin, the MIC modes were 32 µg/ml  
255 (min= 8 µg/ml; max=124 µg/ml) and 4 µg/ml (min=1 µg/ml; max=32 µg/ml) under  
256 anaerobic and aerobic conditions respectively (Supplementary Table 4). The rates of  
257 resistance under anaerobic (n=67/67; 100%) and aerobic (n=15/67; 22%) conditions  
258 were significantly different (Fig. 1B; McNemar's test  $p < 0.001$ ; Supplementary Table 5).  
259 For doxycycline, the MIC modes were 1 µg/ml under both aerobic and anaerobic  
260 conditions, respectively (Supplementary Table 4); one isolate was resistant under  
261 anaerobic conditions alone, and one isolate was resistant under both anaerobic and  
262 aerobic conditions. The odds of classifying isolates as resistant increased over 10 times  
263 for ciprofloxacin (OR= 10.5; 95% CI= 3.61-37.7) and over 200 times for azithromycin  
264 (OR = 213; 95% CI= 31.9->5000) under anaerobic compared to aerobic conditions.

265 To evaluate the generalizability of these findings from the primary sample collection, we  
266 also compared aerobic and anaerobic growth curves of 277 isolates from the secondary

267 sample collection. For ciprofloxacin, the rates of resistance were significantly different  
268 under anaerobic conditions (21%; n= 58/277) compared to aerobic conditions (1.1%; n=  
269 3/277; McNemar's test  $p < 0.001$ ; Supplementary Table 6). For azithromycin, the rates of  
270 resistance were significantly different under anaerobic conditions (100%; N= 277/277)  
271 compared to aerobic conditions (57%; N= 159/277; McNemar's test  $p < 0.001$ ;  
272 Supplementary Table 6). For doxycycline, only two isolates were resistant under  
273 anaerobic conditions alone and one under both anaerobic and aerobic conditions  
274 (Supplementary Table 6). The odds of classifying isolates as resistant increased over  
275 25 times for ciprofloxacin (OR= 25.7; 95% CI= 18.8-34.6) and 119 times for  
276 azithromycin (OR = 119; 95% CI= 20.95 – 4739) under anaerobic compared to aerobic  
277 conditions.

278 **Addition of catalase to test if reactive oxygen species effect antibiotic**  
279 **resistance/sensitivity under aerobic conditions.** In this experiment, catalase was  
280 added to the media to quench hydrogen peroxide with the objective of testing the  
281 hypothesis that susceptibility under aerobic conditions was associated with ROS (e.g.  
282 hydrogen peroxide). For ciprofloxacin, the MICs for the sensitive reference strain E7946  
283 (Cip<sup>S</sup>, Azi<sup>S</sup>, Dox<sup>S</sup>) and the resistant clinical isolate EN160 (Cip<sup>R</sup>, Azi<sup>R</sup>, Dox<sup>S</sup>) remained  
284 unchanged when catalase was added to the media under aerobic conditions. The  
285 addition of catalase was not associated with differences in AUCs for both E7946 and  
286 EN160 in media containing ciprofloxacin, azithromycin, or doxycycline at 2-fold below  
287 the MIC. The AUCs in LB media with and without catalase alone for E7946 and EN160  
288 were not statistically different (Supplementary Table 7).

289 **Molecular AMR correlates under aerobic and anaerobic conditions.** The distribution  
290 of known AMR genetic elements is shown (Fig. 2B). AMR-associated point mutations  
291 (likely transmitted vertically, not on an established mobilizable element), and genes on  
292 known horizontally transferred mobilizable elements, are provided (Supplementary  
293 Material). The integrative conjugative element (ICE) SXT/R391 was found in 90%  
294 (60/67) of isolates. The ICE elements contained the pentapeptide repeat protein that  
295 confers fluoroquinolone resistance (*qnr<sub>VC</sub>*), the macrolide-inactivating  
296 phosphotransferase (*mphA*), and the major facilitator superfamily (MFS) efflux pump  
297 conferring tetracycline resistance (*tet(59)*) [52-55]. The genes *qnr<sub>VC</sub>*, *mphA*, and *tet(59)*  
298 were found in 78% (52/66), 33% (22/66), and 78% (52/66) of isolates, respectively.  
299 Ciprofloxacin resistance under both anaerobic and aerobic conditions was significantly  
300 associated with *qnr<sub>VC</sub>*, *gyrA* and *parC* (Supplementary Table 8). Identification of the  
301 known azithromycin AMR gene *mphA* was significantly associated with resistance under  
302 aerobic conditions alone ( $P < 0.001$ ). The gene *tet(59)* was not associated with  
303 doxycycline resistance under aerobic or anaerobic conditions (both  $p = 0.566$ ).

304 We next used GWAS to comprehensively explore the genetic basis of AMR. This  
305 approach used the phenotype of AUC to represent 'growth' with or without exposure to  
306 the three test antibiotics at five concentrations under either aerobic or anaerobic  
307 conditions. Growth phenotypes (analyzed by AUCs) at similar antibiotic concentrations  
308 were positively correlated within aerobic and anaerobic conditions for all three  
309 antibiotics (Fig. 3). Growth phenotypes were also positively correlated between aerobic  
310 and anaerobic conditions for ciprofloxacin (Fig. 3A). However, phenotypes were weakly,  
311 or even negatively, correlated between aerobic and anaerobic conditions for

312 azithromycin and doxycycline (Fig. 3B,C). These results support the hypothesis that  
313 anaerobic and aerobic growth under antibiotic pressure can differ and be distinct to  
314 antibiotic type.

315 The heritability of the AMR phenotypes (AUCs) was estimated prior to the GWAS.  
316 Heritability ( $h^2$ ) is defined as the proportion of phenotypic variation explained by genetic  
317 variation, measured as unique contiguous tracts of the assembled genomes (unitigs)  
318 that tag both single nucleotide variants, indels, and gene content changes (Methods).  
319 We found relatively high heritability ( $h^2$  in the range 0.60-0.99) of growth across  
320 concentrations of ciprofloxacin under both aerobic and anaerobic conditions, yielding  
321 statistically significant GWAS hits (Table 1; Supplementary Data Files S1 and S2): 20  
322 under aerobic conditions and 16 under anaerobic conditions. In contrast, heritability  
323 tended to be much lower under aerobic compared to anaerobic conditions for both  
324 azithromycin and doxycycline, yielding significant GWAS hits only under anaerobic  
325 conditions (Table 1; Supplementary Data Files S3 and S4, respectively): 3 for  
326 azithromycin under anaerobic conditions alone and 57 for doxycycline under anaerobic  
327 conditions alone.

328 AMR genes identified by GWAS were diverse (Fig. 4; Supplementary Data Files S1-S4).  
329 These candidates included known AMR genes, such as *qnr<sub>Vc</sub>* and *dfrA*, which were  
330 associated with ciprofloxacin resistance under both aerobic and anaerobic conditions.  
331 We identified seven genes associated with ciprofloxacin resistance under anaerobic  
332 conditions alone (including the stress response gene *barA* and a *radC* homolog involved  
333 in DNA repair; Supplementary Data File S2), and ten genes under aerobic conditions  
334 alone (including *rtxB*; Supplementary Data File S1). Under anaerobic conditions, most



335 genes were identified at ciprofloxacin concentrations at, or above, 0.25 µg/ml; however,  
336 four genes, including *barA*, were identified under one of the lowest tested ciprofloxacin  
337 concentrations (0.13 µg/ml; Supplementary Data File S2). GWAS hits for azithromycin  
338 and doxycycline resistance were found only under anaerobic conditions. For  
339 azithromycin, two genetic elements were identified: *mphA* and a region between *ompT*  
340 and *dinG* (*ompT-dinG*; Supplementary Data File S3). For doxycycline, 23 genes were  
341 shared across concentrations; however, the gene discovery rate was highest at the  
342 lower concentrations (n=53 at 0.13 µg/ml; n =26 µg/ml; Supplementary Data File S4).  
343 GWAS hits included the major facilitator superfamily antibiotic efflux pump *tet(59)* (Fig.  
344 4, Supplementary Data Files). Most genetic elements identified have unknown function.  
345 The identification of known AMR genes by GWAS serves as positive control and  
346 suggests that the genes of unknown function may indeed play a role in AMR.

347 **Antibiotics detected in stool by LC-MS/MS.** Finally, we sought to test the hypothesis  
348 that AMR genotypes and phenotypes would be associated with measured  
349 concentrations of antibiotics in stool. A combined total of 196 antibiotics were detected  
350 in the 51 stool supernatants tested by mass spectrometry using a targeted technique for  
351 9 common antibiotics (Fig. 5). At least one antibiotic was detected in 98% (n=50/51), at  
352 least two antibiotics were detected in 94% (n=48/51), and three or more antibiotics were  
353 detected in 90% (n=46/51) of stool supernatants (Fig. 5). Antibiotics detected were  
354 ciprofloxacin (n=48/51; 94%), tetracycline / doxycycline (n=46/51; 90%), nalidixic acid  
355 (n=41/51; 80%), metronidazole (n=37/51; 73%), sulfamethoxazole/trimethoprim  
356 (n=22/51; 43%), and amoxicillin (n=2/51; 4%); azithromycin was not detected. Detection  
357 of quinolone/fluoroquinolone and tetracycline/doxycycline in stool by LC-MS/MS was not

358 associated with AMR genotypes or phenotypes (Supplementary Table 9). Associations  
359 for azithromycin could not be tested because azithromycin was not detected in any stool  
360 supernatant.

## 361 **DISCUSSION**

362 In this study, *V. cholerae* isolates from cholera patients were found to be more resistant  
363 to antibiotic exposure under anaerobic conditions compared to aerobic conditions (Fig.  
364 1). This phenotype differed by antibiotic class. Novel genetic elements were found to  
365 associate with AMR under anaerobic conditions which also differed by antibiotic class  
366 (Fig. 4). The approach of using a continuous variable (area under the growth curve  
367 (AUC)) for the AMR phenotype within the framework of GWAS may provide a new  
368 approach to identify putative AMR genetic targets for future mechanistic research.

369 CLSI breakpoints for enteropathogens like *V. cholerae* were developed under aerobic  
370 conditions [45, 56]. CLSI and other clinical reference bodies set breakpoints to have  
371 clinical relevance despite limited data from clinical studies [56-58]. In this context, the  
372 odds of classifying isolates in the primary collection as resistant under anaerobic  
373 conditions compared to aerobic conditions increased over 10 times for ciprofloxacin and  
374 over 200 times for azithromycin. These results are likely general across *V. cholerae*  
375 because in the secondary collection, which is separated by more than 10 years, we  
376 found that the odds of classifying isolates as resistant under anaerobic conditions  
377 compared to aerobic conditions increased over 20 times for ciprofloxacin and over 100  
378 times for azithromycin.

379 There are several physiologic explanations for increased antibiotic resistance under  
380 anaerobic conditions. ROS induce both intracellular and cell-wall stress and are at  
381 higher concentrations under aerobic conditions [59]. ROS may have acted  
382 synergistically to potentiate antibiotic lethality [31, 60]. The assays that utilized catalase  
383 to quench hydrogen peroxide under aerobic conditions were conducted to evaluate this  
384 possibility. The MICs for all three antibiotics did not increase with the addition of  
385 catalase suggesting that the reduction of ROS alone cannot account for increased MICs  
386 observed under anaerobic conditions (Supplementary Table 7). We hypothesize that  
387 reduced growth under anaerobic conditions might decrease the effectiveness of  
388 antimicrobial agents that directly or indirectly disrupt cell envelope integrity [61]. While  
389 reduced growth was observed under anaerobic conditions, the antibiotics tested are not  
390 known to directly disrupt the cell envelope. However, off target effects (e.g. cell  
391 envelope stress) by CIP, AZI, and DOX may have occurred.

392 To further investigate AMR phenotypes under anaerobic conditions, future studies will  
393 benefit from the use of a defined medium (such as M9) where the carbon source and an  
394 alternative electron acceptor (e.g. fumarate, nitrate, dimethylsulfoxide, or trimethylamine  
395 N-oxide) can be supplemented to strictly control anaerobic respiration versus  
396 fermentation. Buffering the medium (e.g. with PBS or bicarbonate) to a neutral pH is  
397 important because *V. cholerae* can acidify the medium over time, with toxic effects. In  
398 prior research, acidification occurred after 10 hours [9]. In our shorter 8-hour assay,  
399 acidification was observed under anaerobic conditions among 1 of 4 strains tested  
400 (Supplementary Table 3). Furthermore, buffering to the alkaline pH found in cholera  
401 stool (pH 8.5-9) will provide important insight given that *V. cholerae* utilizes nitrate for

402 anaerobic respiration only at alkaline pH [2, 9]. Here we used an undefined medium  
403 (LB) without a defined, saturating concentration of an alternative electron acceptor. This  
404 approach likely resulted in mixed anaerobic respiration and fermentation. To address  
405 these limitations in future studies, robotic automation and 384-well formatted assays  
406 would enable a scalable system for multiple defined media across broad gradients of  
407 antibiotics. Ideally, we would simulate the conditions of the human gut, but in practice  
408 these conditions can only be approximated.

409 There are many knowledge gaps on the genetic basis of the AMR phenotypes under  
410 varying environmental conditions. This study prioritized the factor of oxygen exposure  
411 as a determinant of AMR phenotypes because facultative anaerobic enteropathogens  
412 experience hypoxia and anoxia in the animal gut [9]. The first phase of the analysis  
413 focused on previously known AMR genotypes with known AMR phenotypes. For  
414 ciprofloxacin, mutations in *parC* and carriage of *qnr<sub>VC</sub>* were significantly associated with  
415 phenotypic resistance under aerobic and anaerobic conditions; mutations in *gyrA* were  
416 significantly associated with resistance under anaerobic conditions alone  
417 (Supplementary Table 8). For azithromycin, *mphA* was identified and significantly  
418 associated with AMR under aerobic conditions alone. While *tet(59)* was identified, very  
419 few isolates were identified as resistant to doxycycline under aerobic (n=1) or anaerobic  
420 conditions (n=2). These associative data begin to reveal a difference between AMR  
421 genotypes and phenotypes under aerobic and anaerobic conditions.

422 The second phase of analysis sought to use GWAS to identify previously unknown  
423 genetic targets associated with AMR. The continuous variable of AUC, as opposed to  
424 the binary variable of growth/ no growth, was used in assays with and without antibiotic

425 exposure under aerobic and anaerobic conditions. Antibiotics at the breakpoint and sub-  
426 breakpoint concentrations were chosen based on a rationale that different genetic  
427 elements might contribute differently to AMR phenotypes at different antibiotic  
428 concentrations. As expected, GWAS identified *qnr<sub>Vc</sub>* for ciprofloxacin exposure under  
429 both aerobic and anaerobic conditions (Fig. 4). GWAS identified *mphA* for azithromycin  
430 exposure under anaerobic conditions alone and *tet(59)* for doxycycline exposure under  
431 anaerobic conditions alone. These results of known AMR genes served as ‘positive  
432 controls’ for the GWAS. We also note that genes known to be important for anaerobic  
433 respiration (e.g. *tatA1*, *tatC*, *ccmA-F*, *ccmH*, *moaA-D*, *moeA-B*, *napA-D*, *napF*, *fnr*, *narP*-  
434 *Q*, *nqrF*, *dsbA*, *dsbD*, *hemN*) in *V. cholerae* were not identified as GWAS hits [9]. This  
435 suggests that our GWAS was specific to AMR phenotypes and was not liable to detect  
436 genes related to anaerobic conditions alone. We therefore expect novel GWAS hits to  
437 be likely candidates for involvement in AMR phenotypes.

438 For ciprofloxacin, seven genes were associated with AMR in anaerobic conditions  
439 alone; these included a gene involved in DNA repair (*radC*), 2-component histidine  
440 kinase involved in stress response (*barA*), and an ATP-dependent zinc protease. The  
441 gene *dfrA31* encodes a trimethoprim-resistant dihydrofolate reductase and APH(6)-IId  
442 encodes a streptomycin phosphotransferase enzyme; both genes were identified for  
443 aerobic and anaerobic conditions. These two genes are located on the SXT element  
444 along with *qnr<sub>Vc</sub>* and may therefore be associated due to genetic linkage rather than due  
445 to causal roles in ciprofloxacin resistance. For azithromycin, one additional genetic  
446 element under anaerobic conditions was discovered to associate with AMR: an  
447 intergenic region between *ompT* (porin; known to be associated with AMR) [62, 63] and

448 *dinG* (ATP-dependent DNA helicase). For doxycycline, a diverse set of 57 genetic  
449 elements under anaerobic conditions alone were discovered to associate with AMR.  
450 These include *vexK* (efflux RND transporter permease associated with AMR) [64-66],  
451 and *zorA* (anti-phage defense system ZorAB subunit A; a putative proton channel that  
452 may respond to membrane perturbation by depolarization) [67].

453 In addition to the SXT element, genes associated with an AMR phenotype were also  
454 discovered on the *Vibrio* Pathogenicity Island II (VSP<sub>II</sub>; N16961 VC0506-VC0512 /  
455 E7946 loci RS02705-RS02745); these loci are genetically diverse in Bangladesh [68].  
456 The GWAS hits in VSP<sub>II</sub> encode both biofilm/ auto-aggregation associated factors as  
457 well as an aerotaxis protein (AerB; VC0512) [69]; findings consistent with roles in AMR  
458 and aerobic/anaerobic conditions. These GWAS analyses were of limited power due to  
459 the modest sample size, and could be sensitive to false positives at AMR ‘hot-spots’ like  
460 SXT. Despite these limitations, GWAS enabled the discovery of an intriguing list of  
461 genetic targets that were associated with AMR and require future mechanistic molecular  
462 analysis to test for causal relationships.

463 LC-MS/MS analysis on the stools from the primary collection, stools from which the  
464 isolates were obtained, was conducted to test the hypothesis that the rates of AMR  
465 genotypes and phenotypes were higher when the stool samples contained the cognate  
466 antibiotic. Nearly all patients shed at least one antibiotic, making it difficult to identify  
467 AMR correlates to exposure (Fig. 5). This finding is important because studies that  
468 leverage natural infection to set clinically meaningful AMR breakpoints under aerobic  
469 conditions, and now anaerobic conditions, cannot readily be performed because of the  
470 degree of antibiotic exposure among diarrheal patients. Therefore, future interventional

471 clinical studies with known antibiotic exposure determined *a priori* may be required.  
472 Given that the primary collection is from patients that self-reported not taking antibiotics,  
473 the detection of a combined total of 196 antibiotics further highlights the ubiquity of  
474 antibiotics and the limited value of self-reported antibiotic exposure.

## 475 **Conclusions**

476 Facultative enteropathogens are exposed to antibiotics under aerobic and anaerobic  
477 conditions in both the human gut and in the environment. We used the facultative  
478 anaerobic enteropathogen *V. cholerae* as a model to test for differences in AMR  
479 phenotypes under aerobic and anaerobic conditions. Increased resistance was found  
480 under anaerobic conditions compared to aerobic conditions. Using AMR breakpoints  
481 established for aerobic conditions, the odds of classifying isolates as resistant under  
482 anaerobic compared to aerobic conditions increased over 10 times for two of the three  
483 antibiotics tested. While several known resistance genes were associated with AMR  
484 under both conditions, many genes were only associated with AMR under one  
485 condition. Heritability tended to be higher, and more genes associated with resistance,  
486 under anaerobic conditions. This suggests that key genetic determinants of resistance  
487 may be missed when experiments are only performed aerobically. Our findings provide  
488 a rationale to determine if increased MICs under anaerobic conditions are associated  
489 with therapeutic failures and/or microbial escape in cholera patients, and if true, there  
490 may be a need to determine AMR breakpoints for anaerobic conditions.

491

## 492 **Acknowledgements**

493 We thank the patients for participating in this study and the icddr,b clinical and  
494 laboratory teams that collected the samples. We are grateful to Randy Autrey and Krista  
495 Berquist for their administrative expertise, as well as Glenn Morris at the Emerging  
496 Pathogens Institute and Desmond Schatz in the Department of Pediatrics at the  
497 University of Florida for their ongoing support. Stephen Calderwood, Jason Harris, and  
498 Regina LaRocque were the principal investigators (PI) of the parent study/IRB protocol  
499 (Massachusetts General Hospital, Harvard University School of Medicine, USA) under  
500 which the samples were collected by EJM when he was a NIH Fogarty Fellow. Andrew  
501 Camilli provided additional reagents and insights for this manuscript; FQ was the  
502 principal investigator in Bangladesh and PI of the ERC/RRC approvals at the icddr,b.  
503 This generous research infrastructure and support was invaluable to the success of this  
504 study.

505

## 506 **Financial Support**

507 This work was supported by the National Institutes of Health grants to EJM  
508 [DP5OD019893, R21TW010182] and KBB [S10 OD021758-01A1] and internal support  
509 from the Emerging Pathogens Institute, and the Departments of Pediatrics and the  
510 Department of Environmental and Global Health at the University of Florida. BJS and  
511 MMS were supported by a Genome Canada and Genome Quebec Bioinformatics and  
512 Computational Biology grant. ACM was supported in part by a grant from the Children's  
513 Miracle Network (Florida).



514 **Disclaimer**

515 The funders had no role in study design, data collection and analysis, decision to  
516 publish, or preparation of the manuscript.

517 **Potential conflicts of interest.**

518 All authors: No reported conflicts.

519 **FIGURES**  
 520  
 521 **FIGURE 1**

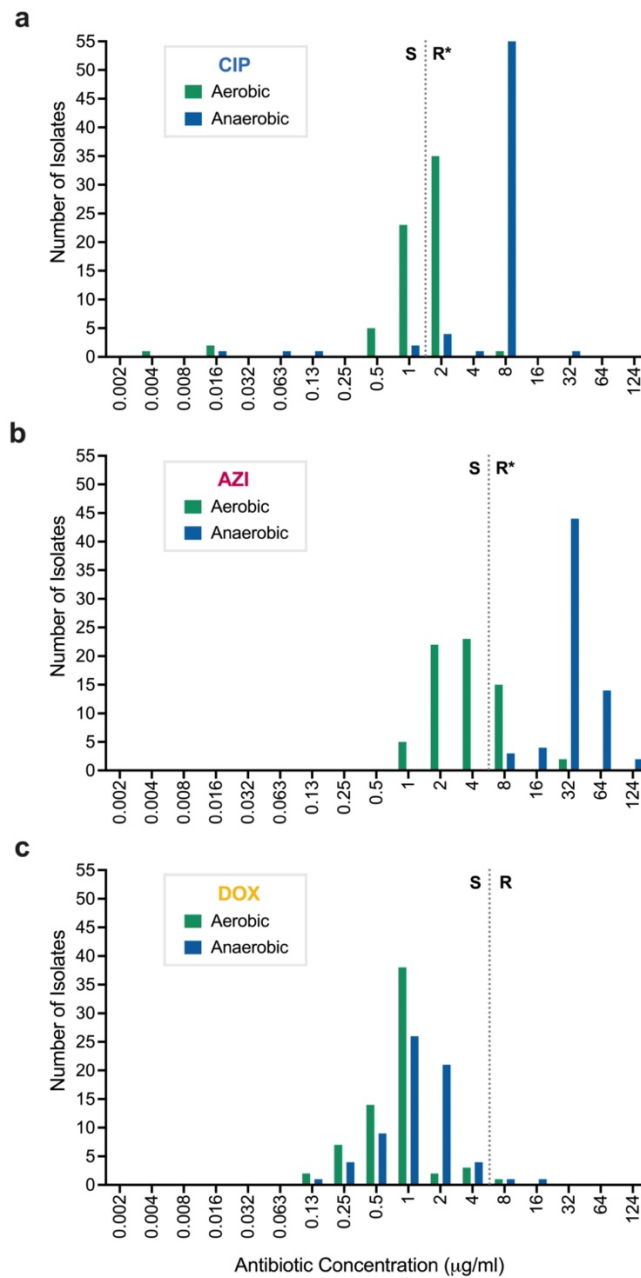

522

523 **FIG 1** Distribution of minimal inhibitory concentrations (MICs) under aerobic and anaerobic conditions  
 524 among clinical isolates from the primary collection. Ciprofloxacin (CIP; **a**), Azithromycin (AZI; **b**), and  
 525 Doxycycline (DOX; **c**). Data are from 67 human-shed *V. cholerae* isolates. The MICs for each isolate  
 526 under aerobic (green) and anaerobic (blue) conditions were enumerated, and the number of isolates with  
 527 a given MIC ( $\mu\text{g/ml}$ ) are represented as bars. Dotted lines are the breakpoint for resistance per CLSI  
 528 standards which are based on assays under aerobic conditions (CIP = 2  $\mu\text{g/ml}$ ; AZI = 8  $\mu\text{g/ml}$ ; DOX = 8  
 529  $\mu\text{g/ml}$ ). S=sensitive. R = Resistant. “\*” represents a significant difference in the frequency of isolates  
 530 identified as resistant to ciprofloxacin and azithromycin by McNemar’s test (both  $p < 0.001$ ).

531 **FIGURE 2**

532

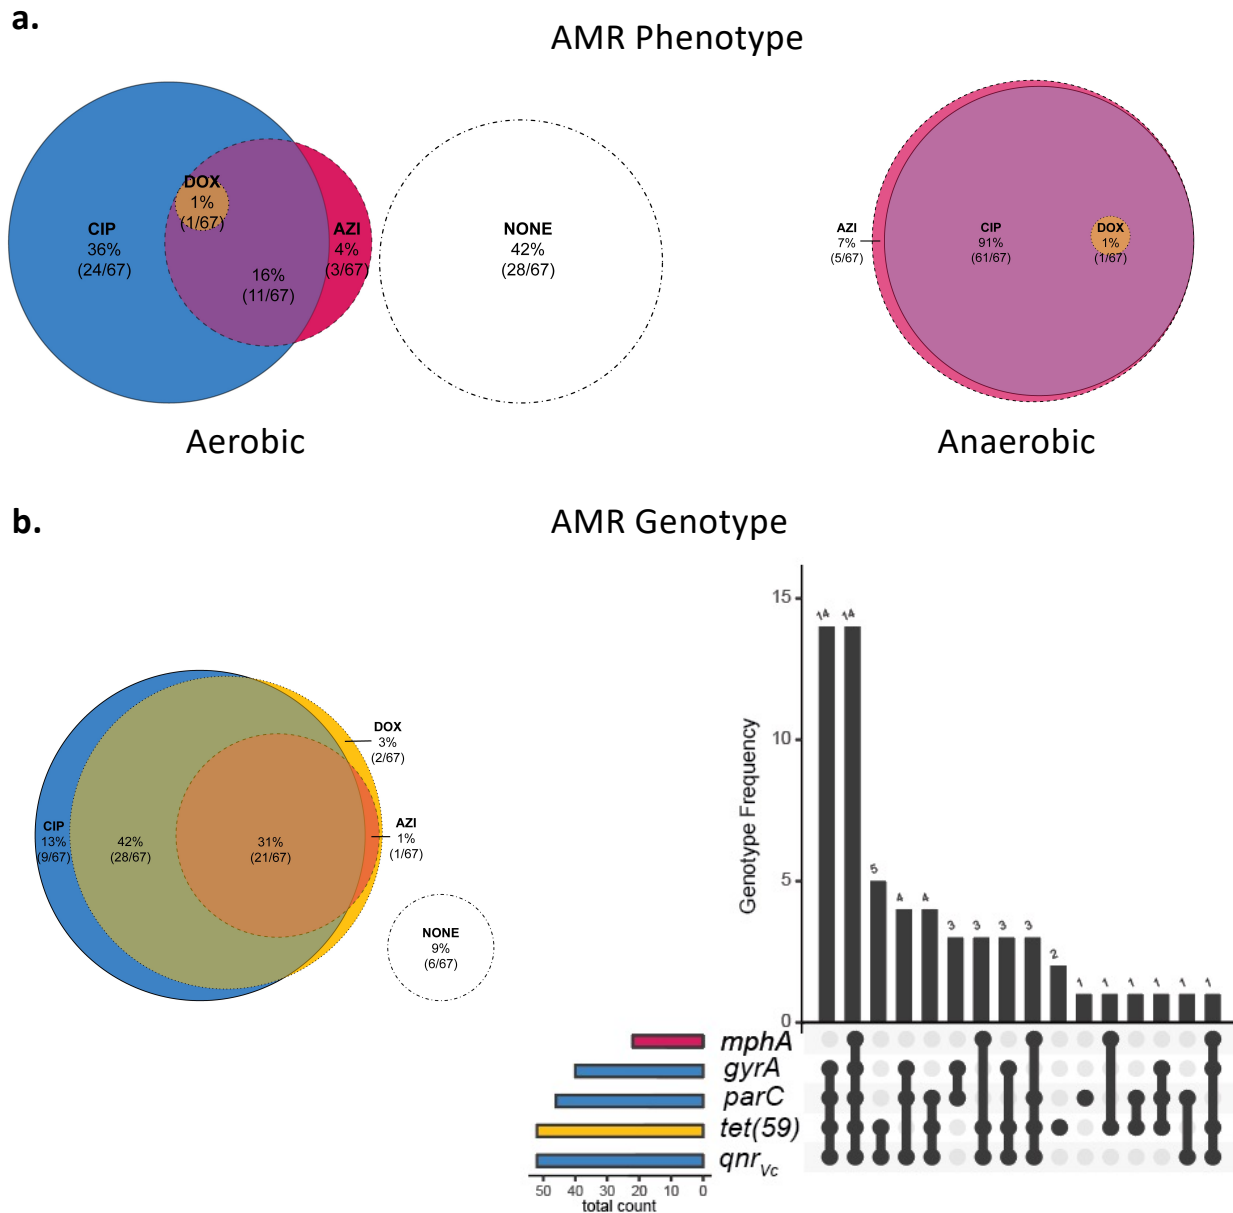

533

534

535

536

537

538

539

540

541

542

543

544

545

546

**FIG 2** AMR phenotypes and known AMR genetic elements in human-shed *V. cholerae* isolates from the primary collection. Pink, yellow, and blue color coding is used to respectively indicate AMR phenotypes and genotypes to azithromycin (AZI), doxycycline (DOX) and ciprofloxacin (CIP); colors blend when overlapped. Isolates with no resistance (sensitive) are shown in white circles. **(a)** Proportional Venn diagram (Euler) of AMR phenotypes to AZI, DOX, and/or CIP under aerobic (left) and anaerobic conditions (right). Counts indicate the number of isolates with the corresponding phenotype. **(b)** AMR genotypes from known resistance genes in whole genome sequences. Shown is the distribution of known AMR genetic elements by proportional Venn diagram (Euler; left) and bar chart (right). On right, the X axis of the bar chart depicts the presence (black points) of known AMR genes (*mphA*, *gyrA*, *parC*, *tet(59)*, *qnr<sub>Vc</sub>*) in a given genome and the Y axis depicts the number of isolates that share the given combination of AMR genes. Coloured bars to the left indicate the number of isolate genomes encoding resistance genes to CIP (blue), AZI (pink), or DOX (yellow). AMR genetic elements to other antibiotics are not shown.

547 **FIGURE 3**

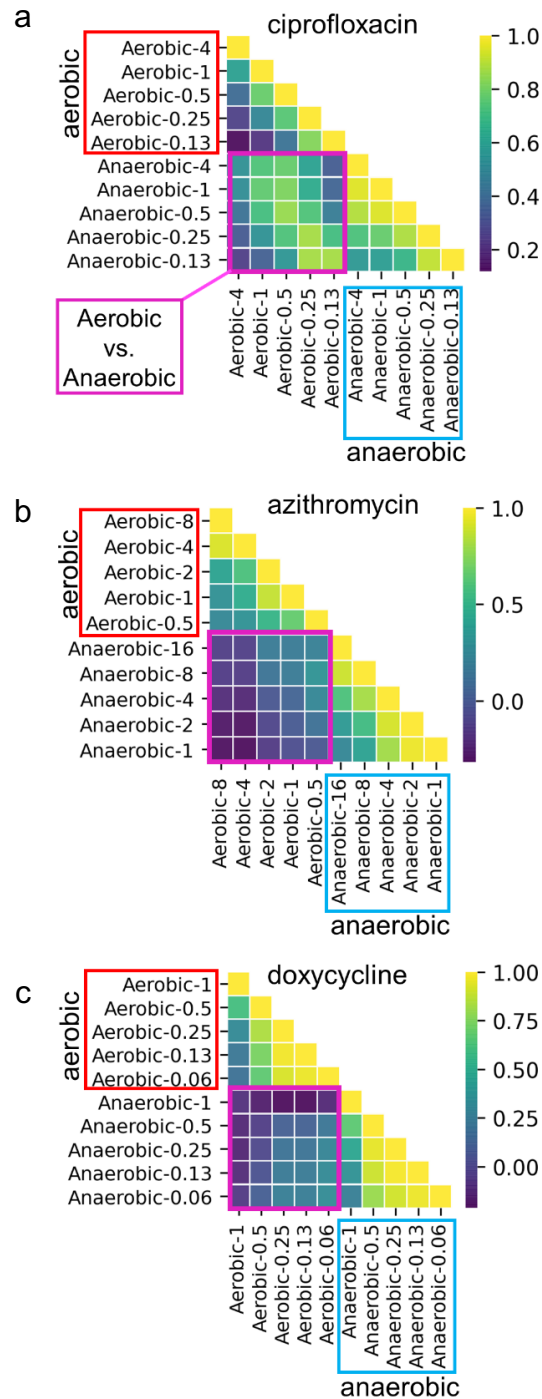

548  
 549 **FIG 3** Correlation analysis of growth phenotypes at different concentrations of antibiotics under aerobic  
 550 and anaerobic conditions among *V. cholerae* clinical isolates from the primary collection. Antibiotic  
 551 exposures were ciprofloxacin (a), azithromycin (b), and doxycycline (c). AUC was analyzed as the growth  
 552 parameter. Aerobic/anaerobic conditions are labeled horizontally and vertically with the antibiotic  
 553 concentration in  $\mu\text{g/ml}$  (e.g., “Anaerobic-0.06”). Analyses are grouped: aerobic vs aerobic = red boxes;  
 554 anaerobic vs aerobic = purple box; anaerobic vs anaerobic = blue boxes. Heatmaps show correlation  
 555 coefficients (scale bar is to right) for similar (yellow) vs dissimilar (purple) growth at two given conditions.

556 **FIGURE 4**

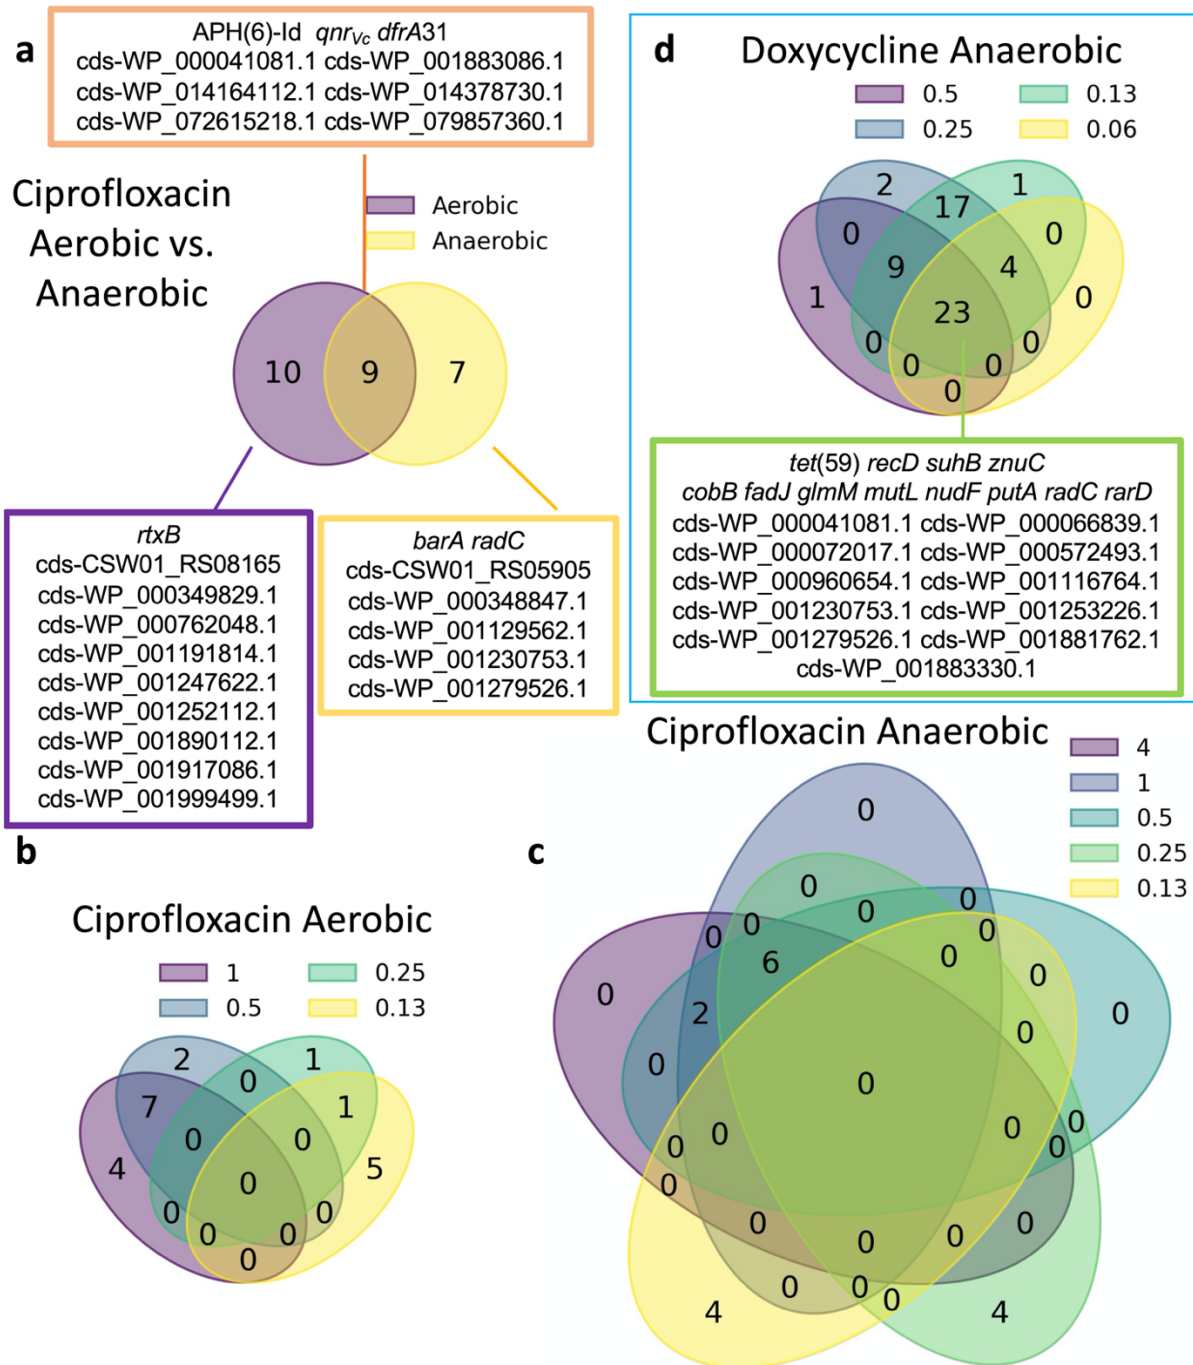

557  
 558  
 559  
 560  
 561  
 562  
 563  
 564

**FIG 4** Distribution of AMR genes associated with AMR growth phenotypes at different concentrations of antibiotics under aerobic and anaerobic conditions among isolates from the primary collection. Venn diagrams show the overlap between genes associated with (a) ciprofloxacin resistance under aerobic vs. anaerobic conditions, (b) ciprofloxacin at different concentrations (µg/ml) under aerobic conditions, (c) ciprofloxacin at different concentrations (µg/ml) under anaerobic conditions, and (d) doxycycline at different concentrations (µg/ml) under anaerobic conditions. Genes shown in boxes had statistically significant associations.

565 **FIGURE 5.**

|              | CIP | TET/DOX | NAL | MET | BAC | AMO | AZI | ERY | CEF | Detected (N)           |
|--------------|-----|---------|-----|-----|-----|-----|-----|-----|-----|------------------------|
| EN123        | +   | +       | +   | +   | +   | +   | -   | -   | -   | 6                      |
| EN160        | +   | +       | +   | +   | +   | +   | -   | -   | -   | 6                      |
| EN127        | +   | +       | +   | +   | +   | -   | -   | -   | -   | 5                      |
| EN129        | +   | +       | +   | +   | +   | -   | -   | -   | -   | 5                      |
| EN135        | +   | +       | +   | +   | -   | -   | -   | -   | -   | 4                      |
| EN149        | +   | +       | +   | +   | +   | -   | -   | -   | -   | 5                      |
| EN153        | +   | +       | +   | +   | +   | -   | -   | -   | -   | 5                      |
| EN162        | +   | +       | +   | +   | +   | -   | -   | -   | -   | 5                      |
| EN164        | +   | +       | +   | +   | +   | -   | -   | -   | -   | 5                      |
| EN166        | +   | +       | +   | +   | +   | -   | -   | -   | -   | 5                      |
| EN168        | +   | +       | +   | +   | +   | -   | -   | -   | -   | 5                      |
| EN178        | +   | +       | +   | +   | +   | -   | -   | -   | -   | 5                      |
| EN182        | +   | +       | +   | +   | +   | -   | -   | -   | -   | 5                      |
| EN183        | +   | +       | +   | +   | +   | -   | -   | -   | -   | 5                      |
| EN185        | +   | +       | +   | +   | +   | -   | -   | -   | -   | 5                      |
| EN188        | +   | +       | +   | +   | +   | -   | -   | -   | -   | 5                      |
| EN071        | +   | +       | -   | +   | +   | -   | -   | -   | -   | 4                      |
| EN078        | +   | +       | +   | -   | +   | -   | -   | -   | -   | 4                      |
| EN079        | +   | +       | +   | +   | -   | -   | -   | -   | -   | 4                      |
| EN125        | +   | +       | +   | -   | +   | -   | -   | -   | -   | 4                      |
| EN143        | +   | +       | +   | -   | -   | -   | -   | -   | -   | 3                      |
| EN144        | +   | +       | +   | +   | -   | -   | -   | -   | -   | 4                      |
| EN145        | +   | +       | +   | +   | -   | -   | -   | -   | -   | 4                      |
| EN148        | +   | +       | +   | +   | -   | -   | -   | -   | -   | 4                      |
| EN150        | +   | +       | +   | +   | -   | -   | -   | -   | -   | 4                      |
| EN155        | +   | +       | +   | +   | -   | -   | -   | -   | -   | 4                      |
| EN156        | +   | +       | -   | +   | +   | -   | -   | -   | -   | 4                      |
| EN159        | +   | +       | +   | -   | +   | -   | -   | -   | -   | 4                      |
| EN165        | +   | +       | +   | +   | -   | -   | -   | -   | -   | 4                      |
| EN167        | +   | +       | +   | +   | -   | -   | -   | -   | -   | 4                      |
| EN169        | +   | +       | +   | +   | -   | -   | -   | -   | -   | 4                      |
| EN171        | +   | +       | -   | +   | +   | -   | -   | -   | -   | 4                      |
| EN174        | +   | +       | +   | -   | +   | -   | -   | -   | -   | 4                      |
| EN181        | +   | +       | +   | +   | -   | -   | -   | -   | -   | 4                      |
| EN184        | +   | +       | +   | +   | -   | -   | -   | -   | -   | 4                      |
| EN189        | +   | +       | +   | +   | -   | -   | -   | -   | -   | 4                      |
| EN018        | +   | +       | -   | +   | -   | -   | -   | -   | -   | 3                      |
| EN026        | +   | +       | -   | +   | -   | -   | -   | -   | -   | 3                      |
| EN027        | +   | +       | -   | +   | -   | -   | -   | -   | -   | 3                      |
| EN095        | +   | +       | +   | -   | -   | -   | -   | -   | -   | 3                      |
| EN096        | +   | +       | +   | -   | -   | -   | -   | -   | -   | 3                      |
| EN133        | +   | +       | +   | -   | -   | -   | -   | -   | -   | 3                      |
| EN134        | +   | +       | +   | -   | -   | -   | -   | -   | -   | 3                      |
| EN141        | +   | +       | +   | -   | -   | -   | -   | -   | -   | 3                      |
| EN147        | +   | +       | +   | -   | -   | -   | -   | -   | -   | 3                      |
| EN191        | +   | +       | -   | +   | -   | -   | -   | -   | -   | 3                      |
| EN072        | +   | -       | -   | +   | -   | -   | -   | -   | -   | 2                      |
| EN173        | +   | -       | -   | +   | -   | -   | -   | -   | -   | 2                      |
| EN137        | -   | -       | +   | -   | -   | -   | -   | -   | -   | 1                      |
| EN146        | -   | -       | +   | -   | -   | -   | -   | -   | -   | 1                      |
| EN132        | -   | -       | -   | -   | -   | -   | -   | -   | -   | 0                      |
| Detected (N) | 48  | 46      | 41  | 37  | 22  | 2   | 0   | 0   | 0   | 196 total detected     |
| Positive (%) | 94  | 90      | 80  | 73  | 43  | 4   | 0   | 0   | 0   | 98% with antibiotic(s) |

566  
567

568 **FIG 5** Antibiotic detection in stool supernatants by mass spectrometry (LC-MS/MS) among cholera  
569 samples from the primary collection. Green with "+" = Detected. White with "-" = not detected. CIP=  
570 ciprofloxacin, TET/DOX= tetracycline and/or doxycycline, NAL = nalidixic acid, MET = metronidazole,  
571 BAC = sulfamethoxazole and/or trimethoprim, AMO = amoxicillin, ERY = erythromycin, CEF =  
572 ceftriaxone. Stool supernatants were not available for EN80, 86, 88, 92, 100, 103, 109, 116-120, 126,  
573 124, 130, 131.

574 **TABLE**

575

576

577 **Table 1.** Identification of genetic elements by GWAS that associate with AMR.

| Condition                  | Outcome <sup>b</sup>   | Antibiotic Concentration (µg/ml) |        |         |         |         |
|----------------------------|------------------------|----------------------------------|--------|---------|---------|---------|
| Ciprofloxacin <sup>a</sup> |                        | CIP4                             | CIP1   | CIP0.5  | CIP0.25 | CIP0.13 |
| Aerobic                    | Heritability ( $h^2$ ) | 0.99                             | 0.73   | 0.60    | 0.74    | 0.92    |
|                            | Associated genes       | 0                                | 11     | 9       | 2       | 6       |
| Anaerobic                  | Heritability ( $h^2$ ) | 0.81                             | 0.73   | 0.72    | 0.72    | 0.87    |
|                            | Associated genes       | 8                                | 8      | 8       | 10      | 4       |
| Azithromycin <sup>a</sup>  |                        | AZI16                            | AZI8   | AZI4    | AZI2    | AZI1    |
| Aerobic                    | Heritability ( $h^2$ ) | -                                | 0.00   | 0.02    | 0.00    | 0.11    |
|                            | Associated genes       | -                                | -      | -       | -       | -       |
| Anaerobic                  | Heritability ( $h^2$ ) | 0.30                             | 0.77   | 0.66    | 0.38    | 0.00    |
|                            | Associated genes       | 2                                | 1      | 0       | 0       | -       |
| Doxycycline <sup>a</sup>   |                        | DOX1                             | DOX0.5 | DOX0.25 | DOX0.13 | DOX0.06 |
| Aerobic                    | Heritability ( $h^2$ ) | 0.00                             | 0.27   | 0.23    | 0.30    | 0.50    |
|                            | Associated genes       | -                                | 0      | 0       | 0       | 0       |
| Anaerobic                  | Heritability ( $h^2$ ) | 0.10                             | 0.61   | 0.72    | 0.72    | 0.77    |
|                            | Associated genes       | 0                                | 23     | 55      | 54      | 17      |

578 <sup>a</sup> Ciprofloxacin = CIP; Azithromycin = AZI; Doxycycline = DOX

579 <sup>b</sup> Heritability is the proportion of phenotypic variation that is explained by genetic variation. Associated  
580 genes are all significant GWAS hits after correction for multiple hypothesis testing ( $P < 0.05$  after  
581 Bonferroni correction).

582

## 583 References

- 584 1. *Performance Standards for Antimicrobial Susceptibility Testing*, 27th ed. Wayne, PA (USA):  
585 Clinical and Laboratory Standards Institute (CLSI); 2017.
- 586 2. **Bueno E, Sit B, Waldor MK, Cava F.** Genetic Dissection of the Fermentative and Respiratory  
587 Contributions Supporting *Vibrio cholerae* Hypoxic Growth. *J Bacteriol* 2020;202(24).
- 588 3. **Bueno E, Pinedo V, Cava F.** Adaptation of *Vibrio cholerae* to Hypoxic Environments. *Front*  
589 *Microbiol* 2020;11:739.
- 590 4. **Xu Q, Dziejman M, Mekalanos JJ.** Determination of the transcriptome of *Vibrio cholerae* during  
591 intrainestinal growth and midexponential phase in vitro. *Proc Natl Acad Sci U S A* 2003;100(3):1286-  
592 1291.
- 593 5. **Mandlik A, Livny J, Robins WP, Ritchie JM, Mekalanos JJ et al.** RNA-Seq-based monitoring of  
594 infection-linked changes in *Vibrio cholerae* gene expression. *Cell Host Microbe* 2011;10(2):165-174.
- 595 6. **Beaber JW, Hochhut B, Waldor MK.** SOS response promotes horizontal dissemination of  
596 antibiotic resistance genes. *Nature* 2004;427(6969):72-74.
- 597 7. **Narendrakumar L, Gupta SS, Johnson JB, Ramamurthy T, Thomas S.** Molecular Adaptations and  
598 Antibiotic Resistance in *Vibrio cholerae*: A Communal Challenge. *Microb Drug Resist* 2019;25(7):1012-  
599 1022.
- 600 8. **Das B, Verma J, Kumar P, Ghosh A, Ramamurthy T.** Antibiotic resistance in *Vibrio cholerae*:  
601 Understanding the ecology of resistance genes and mechanisms. *Vaccine* 2020;38 Suppl 1:A83-A92.
- 602 9. **Bueno E, Sit B, Waldor MK, Cava F.** Anaerobic nitrate reduction divergently governs population  
603 expansion of the enteropathogen *Vibrio cholerae*. *Nat Microbiol* 2018;3(12):1346-1353.
- 604 10. **Nelson EJ, Nelson DS, Salam MA, Sack DA.** Antibiotics for both moderate and severe cholera. *N*  
605 *Engl J Med* 2011;364(1):5-7.
- 606 11. *The treatment of diarrhoea -- A manual for physicians and other senior health workers. —4th*  
607 *rev., 4th Rev. ed.* Geneva, Switzerland: World Health Organization.
- 608 12. **Leibovici-Weissman Y, Neuberger A, Bitterman R, Sinclair D, Salam MA et al.** Antimicrobial  
609 drugs for treating cholera. *Cochrane Database Syst Rev* 2014(6):CD008625.
- 610 13. **Khan AI, Mack JA, Salimuzzaman M, Zion MI, Sujon H et al.** Electronic decision-support  
611 improves diarrhoeal disease guideline adherence (mHealth Diarrhoea Management, mHDM, Trial): a  
612 cluster randomized controlled trial. *Lancet DH* 2020;2:e250-258.
- 613 14. **Biswas D, Hossin R, Rahman M, Bardosh KL, Watt MH et al.** An ethnographic exploration of  
614 diarrheal disease management in public hospitals in Bangladesh: From problems to solutions. *Soc Sci*  
615 *Med* 2020;260:113185.
- 616 15. **Ingle DJ, Levine MM, Kotloff KL, Holt KE, Robins-Browne RM.** Dynamics of antimicrobial  
617 resistance in intestinal *Escherichia coli* from children in community settings in South Asia and sub-  
618 Saharan Africa. *Nat Microbiol* 2018;3(9):1063-1073.
- 619 16. **Towner KJ, Pearson NJ, Mhalu FS, O'Grady F.** Resistance to antimicrobial agents of *Vibrio*  
620 *cholerae* E1 Tor strains isolated during the fourth cholera epidemic in the United Republic of Tanzania.  
621 *Bull World Health Organ* 1980;58(5):747-751.
- 622 17. **Burrus V, Marrero J, Waldor MK.** The current ICE age: biology and evolution of SXT-related  
623 integrating conjugative elements. *Plasmid* 2006;55(3):173-183.
- 624 18. **Hooper DC, Jacoby GA.** Topoisomerase Inhibitors: Fluoroquinolone Mechanisms of Action and  
625 Resistance. *Cold Spring Harb Perspect Med* 2016;6(9).
- 626 19. **Garriss G, Waldor MK, Burrus V.** Mobile antibiotic resistance encoding elements promote their  
627 own diversity. *PLoS Genet* 2009;5(12):e1000775.
- 628 20. **Fonseca EL, Dos Santos Freitas F, Vieira VV, Vicente AC.** New qnr gene cassettes associated with  
629 superintegron repeats in *Vibrio cholerae* O1. *Emerg Infect Dis* 2008;14(7):1129-1131.



- 630 21. **Fyfe C, Grossman TH, Kerstein K, Sutcliffe J.** Resistance to Macrolide Antibiotics in Public Health  
631 Pathogens. *Cold Spring Harb Perspect Med* 2016;6(10).
- 632 22. **Grossman TH.** Tetracycline Antibiotics and Resistance. *Cold Spring Harb Perspect Med*  
633 2016;6(4):a025387.
- 634 23. **Zhu Z, Surujon D, Ortiz-Marquez JC, Huo W, Isberg RR et al.** Entropy of a bacterial stress  
635 response is a generalizable predictor for fitness and antibiotic sensitivity. *Nat Commun* 2020;11(1):4365.
- 636 24. **Wood S, Zhu K, Surujon D, Rosconi F, Ortiz-Marquez JC et al.** A Pangenomic Perspective on the  
637 Emergence, Maintenance, and Predictability of Antibiotic Resistance. In: Tettelin H, Medini D (editors).  
638 *The Pangenome: Diversity, Dynamics and Evolution of Genomes*. Cham (CH) 2020. pp. 169-202.
- 639 25. **Warrier I, Ram-Mohan N, Zhu Z, Hazery A, Echlin H et al.** The Transcriptional landscape of  
640 *Streptococcus pneumoniae* TIGR4 reveals a complex operon architecture and abundant riboregulation  
641 critical for growth and virulence. *PLoS Pathog* 2018;14(12):e1007461.
- 642 26. **Jensen PA, Zhu Z, van Opijnen T.** Antibiotics Disrupt Coordination between Transcriptional and  
643 Phenotypic Stress Responses in Pathogenic Bacteria. *Cell Rep* 2017;20(7):1705-1716.
- 644 27. **van Opijnen T, Dedrick S, Bento J.** Strain Dependent Genetic Networks for Antibiotic-Sensitivity  
645 in a Bacterial Pathogen with a Large Pan-Genome. *PLoS Pathog* 2016;12(9):e1005869.
- 646 28. **Cain AK, Barquist L, Goodman AL, Paulsen IT, Parkhill J et al.** A decade of advances in  
647 transposon-insertion sequencing. *Nat Rev Genet* 2020;21(9):526-540.
- 648 29. **Dorr T, Delgado F, Umans BD, Gerding MA, Davis BM et al.** A Transposon Screen Identifies  
649 Genetic Determinants of *Vibrio cholerae* Resistance to High-Molecular-Weight Antibiotics. *Antimicrob*  
650 *Agents Chemother* 2016;60(8):4757-4763.
- 651 30. **Kohanski MA, Dwyer DJ, Hayete B, Lawrence CA, Collins JJ.** A common mechanism of cellular  
652 death induced by bactericidal antibiotics. *Cell* 2007;130(5):797-810.
- 653 31. **Dwyer DJ, Belenky PA, Yang JH, MacDonald IC, Martell JD et al.** Antibiotics induce redox-  
654 related physiological alterations as part of their lethality. *Proc Natl Acad Sci U S A* 2014;111(20):E2100-  
655 2109.
- 656 32. **Staerck C, Gastebois A, Vandeputte P, Calenda A, Larcher G et al.** Microbial antioxidant defense  
657 enzymes. *Microb Pathog* 2017;110:56-65.
- 658 33. **Smirnova G, Muzyka N, Oktyabrsky O.** Transmembrane glutathione cycling in growing  
659 *Escherichia coli* cells. *Microbiol Res* 2012;167(3):166-172.
- 660 34. **Bryan LE, Kwan S.** Mechanisms of aminoglycoside resistance of anaerobic bacteria and  
661 facultative bacteria grown anaerobically. *J Antimicrob Chemother* 1981;8 Suppl D:1-8.
- 662 35. **Bryan LE.** General mechanisms of resistance to antibiotics. *J Antimicrob Chemother* 1988;22  
663 Suppl A:1-15.
- 664 36. **Bryant RE, Fox K, Oh G, Morthland VH.** Beta-lactam enhancement of aminoglycoside activity  
665 under conditions of reduced pH and oxygen tension that may exist in infected tissues. *J Infect Dis*  
666 1992;165(4):676-682.
- 667 37. **Dwyer DJ, Kohanski MA, Hayete B, Collins JJ.** Gyrase inhibitors induce an oxidative damage  
668 cellular death pathway in *Escherichia coli*. *Mol Syst Biol* 2007;3:91.
- 669 38. **Hong Y, Li Q, Gao Q, Xie J, Huang H et al.** Reactive oxygen species play a dominant role in all  
670 pathways of rapid quinolone-mediated killing. *J Antimicrob Chemother* 2020;75(3):576-585.
- 671 39. **Luan G, Hong Y, Drlica K, Zhao X.** Suppression of Reactive Oxygen Species Accumulation  
672 Accounts for Paradoxical Bacterial Survival at High Quinolone Concentration. *Antimicrob Agents*  
673 *Chemother* 2018;62(3).
- 674 40. **Zhao X, Drlica K.** Reactive oxygen species and the bacterial response to lethal stress. *Curr Opin*  
675 *Microbiol* 2014;21:1-6.
- 676 41. **Van Alst AJ, Demey LM, DiRita VJ.** *Vibrio cholerae* requires oxidative respiration through the bd-  
677 I and cbb3 oxidases for intestinal proliferation. *PLoS Pathog* 2022;18(5):e1010102.

- 678 42. **Van Alst AJ, DiRita VJ.** Aerobic Metabolism in *Vibrio cholerae* Is Required for Population  
679 Expansion during Infection. *mBio* 2020;11(5).
- 680 43. **Nelson EJ, Chowdhury A, Harris JB, Begum YA, Chowdhury F et al.** Complexity of rice-water  
681 stool from patients with *Vibrio cholerae* plays a role in the transmission of infectious diarrhea. *Proc Natl*  
682 *Acad Sci U S A* 2007;104(48):19091-19096.
- 683 44. **Sprouffske K, Wagner A.** Growthcurver: an R package for obtaining interpretable metrics from  
684 microbial growth curves. *BMC Bioinformatics* 2016;17:172.
- 685 45. **M45: Methods for Antimicrobial Dilution and Disk Susceptibility Testing of Infrequently Isolated**  
686 **or Fastidious Bacteria**, 3rd ed. ed. Wayne, PA, USA: Clinical and Laboratory Standards Institute; 2017.
- 687 46. **Drezen E, Rizk G, Chikhi R, Deltel C, Lemaitre C et al.** GATB: Genome Assembly & Analysis Tool  
688 Box. *Bioinformatics* 2014;30(20):2959-2961.
- 689 47. **Lees JA, Galardini M, Bentley SD, Weiser JN, Corander J.** pyseer: a comprehensive tool for  
690 microbial pangenome-wide association studies. *Bioinformatics* 2018;34(24):4310-4312.
- 691 48. **Cook DE, Andersen EC.** VCF-kit: assorted utilities for the variant call format. *Bioinformatics*  
692 2017;33(10):1581-1582.
- 693 49. **Stamatakis A.** RAxML version 8: a tool for phylogenetic analysis and post-analysis of large  
694 phylogenies. *Bioinformatics* 2014;30(9):1312-1313.
- 695 50. **Saber MM, Shapiro BJ.** Benchmarking bacterial genome-wide association study methods using  
696 simulated genomes and phenotypes. *Microb Genom* 2020;6(3).
- 697 51. **Alexandrova L, Haque F, Rodriguez P, Marrazzo AC, Grembi JA et al.** Identification of  
698 widespread antibiotic exposure in cholera patients correlates with clinically relevant microbiota  
699 changes. *J Infect Dis* 2019.
- 700 52. **Leclercq SO, Wang C, Zhu Y, Wu H, Du X et al.** Diversity of the Tetracycline Mobilome within a  
701 Chinese Pig Manure Sample. *Appl Environ Microbiol* 2016;82(21):6454-6462.
- 702 53. **Grossman TH, Starosta AL, Fyfe C, O'Brien W, Rothstein DM et al.** Target- and resistance-based  
703 mechanistic studies with TP-434, a novel fluorocycline antibiotic. *Antimicrob Agents Chemother*  
704 2012;56(5):2559-2564.
- 705 54. **Noguchi N, Emura A, Matsuyama H, O'Hara K, Sasatsu M et al.** Nucleotide sequence and  
706 characterization of erythromycin resistance determinant that encodes macrolide 2'-phosphotransferase  
707 I in *Escherichia coli*. *Antimicrob Agents Chemother* 1995;39(10):2359-2363.
- 708 55. **Chesneau O, Tsvetkova K, Courvalin P.** Resistance phenotypes conferred by macrolide  
709 phosphotransferases. *FEMS Microbiol Lett* 2007;269(2):317-322.
- 710 56. **Humphries RM, Ambler J, Mitchell SL, Castanheira M, Dingle T et al.** CLSI Methods  
711 Development and Standardization Working Group Best Practices for Evaluation of Antimicrobial  
712 Susceptibility Tests. *J Clin Microbiol* 2018;56(4).
- 713 57. **Humphries RM, Abbott AN, Hindler JA.** Understanding and Addressing CLSI Breakpoint  
714 Revisions: a Primer for Clinical Laboratories. *J Clin Microbiol* 2019;57(6).
- 715 58. **Ellington MJ, Ekelund O, Aarestrup FM, Canton R, Doumith M et al.** The role of whole genome  
716 sequencing in antimicrobial susceptibility testing of bacteria: report from the EUCAST Subcommittee.  
717 *Clin Microbiol Infect* 2017;23(1):2-22.
- 718 59. **Stokes JM, Lopatkin AJ, Lobritz MA, Collins JJ.** Bacterial Metabolism and Antibiotic Efficacy. *Cell*  
719 *Metab* 2019;30(2):251-259.
- 720 60. **Wang X, Zhao X, Malik M, Drlica K.** Contribution of reactive oxygen species to pathways of  
721 quinolone-mediated bacterial cell death. *J Antimicrob Chemother* 2010;65(3):520-524.
- 722 61. **Kan B, Habibi H, Schmid M, Liang W, Wang R et al.** Proteome comparison of *Vibrio cholerae*  
723 cultured in aerobic and anaerobic conditions. *Proteomics* 2004;4(10):3061-3067.
- 724 62. **Mathur J, Waldor MK.** The *Vibrio cholerae* ToxR-regulated porin OmpU confers resistance to  
725 antimicrobial peptides. *Infect Immun* 2004;72(6):3577-3583.

- 726 63. **Li CC, Crawford JA, DiRita VJ, Kaper JB.** Molecular cloning and transcriptional regulation of  
727 ompT, a ToxR-repressed gene in *Vibrio cholerae*. *Mol Microbiol* 2000;35(1):189-203.
- 728 64. **Buckley AM, Webber MA, Cooles S, Randall LP, La Ragione RM et al.** The AcrAB-TolC efflux  
729 system of *Salmonella enterica* serovar Typhimurium plays a role in pathogenesis. *Cell Microbiol*  
730 2006;8(5):847-856.
- 731 65. **Taylor DL, Bina XR, Bina JE.** *Vibrio cholerae* VexH encodes a multiple drug efflux pump that  
732 contributes to the production of cholera toxin and the toxin co-regulated pilus. *PLoS One*  
733 2012;7(5):e38208.
- 734 66. **Bina XR, Philippart JA, Bina JE.** Effect of the efflux inhibitors 1-(1-naphthylmethyl)-piperazine  
735 and phenyl-arginine-beta-naphthylamide on antimicrobial susceptibility and virulence factor production  
736 in *Vibrio cholerae*. *J Antimicrob Chemother* 2009;63(1):103-108.
- 737 67. **Doron S, Melamed S, Ofir G, Leavitt A, Lopatina A et al.** Systematic discovery of antiphage  
738 defense systems in the microbial pangenome. *Science* 2018;359(6379).
- 739 68. **Baddam R, Sarker N, Ahmed D, Mazumder R, Abdullah A et al.** Genome Dynamics of *Vibrio*  
740 *cholerae* Isolates Linked to Seasonal Outbreaks of Cholera in Dhaka, Bangladesh. *mBio* 2020;11(1).
- 741 69. **Murphy SG, Johnson BA, Ledoux CM, Dörr T.** *Vibrio cholerae*'s mysterious Seventh  
742 Pandemic island (VSP-II) encodes novel Zur-regulated zinc starvation genes involved in chemotaxis and  
743 autoaggregation. *bioRxiv* 2021:2021.2003.2009.434465.
- 744
